# Supplementary material for: The overexpression of EPS8L1 upregulates TIAM2 to promote cytoskeleton remodeling by activating the Rac1/MAPK signaling pathway in the migration of ovarian cancer
Source: Research Square preprint supplement (doi:10.21203/rs.3.rs-4263533/v1), 2024-04-17
Supplement: Supplementary file 1 [file d465b11ca1e6c3c78c6cde8c.docx]

**Table S1.** shRNA and siRNA sequences

| Gene | shRNA and siRNA sequences |
| --- | --- |
| Sh-control | CTCTGCAGATGATTGTGAA |
| Sh-EPS8L1 | GGTGGAAATGGAGGTCATTctcgagAATGACCTCCATTTCCAC |
|  |  |
| Si-EPS8L1-1(1608)  Si-EPS8L1-2(1047)  Si-EPS8L1-3(885)  Si-TIAM2-1(3947)  Si-TIAM2-2(3740)  Si-TIAM2-3(2982)  Negative control | CUGGAUGACAGUCGUAAGUTT  GUGCUGCAGAAGAUCAAGUTT  GACGUAGAGAGCUUUGUAUTT  GAGGCUCUUUCCUUUAUUATT  GCUGCCUCUUUGAAUUAUATT  CCCUGCACCAUAUGAAUAUTT  UUCUUCGAACGUGUCACGUTT |

**Table S2**

According to the human EPS8LI CDNA sequence (NM_017729) published by Gene Bank, the overexpression sequence 25201-1 was designed. CCGTITITGGCTTTTTTGTTAGACGAAGCTTGGGCTGCAGGTCGACTCTAGAGGATCCCGCCACCATGAACAGAACATGGCCAAGAAGGATCTGGGGGAGCAGCCAGGACGAGGCGGAGCTGATCCGAGAGGACATCCAGGGGGCTCTGCACAATTACCGCTCGGGCCGCGGGGAGCGCAGGGCGGCGGCGCTCAGGGCCACGCAGGAGGAGTTGCAGCGCGACCGCTCGCCCGCCGCTGAGACCCCGCCCCTGCAGCGCCGCCCGTCAGTCCGCGCAGTGATCAGCACCGTAGAGCGGGGCGCGGGCCGCGGACGACCCCAGGCGAAGCCCATTCCCGAGGCAGAGGAGGCGCAGAGGCCTGAGCCGGTGGGGACCTCGAGCAACGCTGACTCGGCCTCCCCGGACCTGGGTCCCCGGGGTCCTGACCTGGCGGTTCTGCAGGCGGAGCGGGAAGTGGACATCCTGAACCACGTGTTCGACGACGTAGAGAGCTTTGTATCGAGGCTGCAGAAGTCGGCGGAGGCGGCCAGGGTGCTGGAGCACCGGGAACGCGGCCGCAGGAGCCGGCGCCGGGCGGCTGGGGAGGGCTTGCTGACGCTGCGGGCCAAGCCGCCCTCGGAGGCCGAGTACACCGACGTGCTGCAGAAGATCAAGTACGCCTTCAGCCTGCTGGCCCGGCTGCGCGGCAACATCGCCGACCCCTCCTCTCCGGAGCTGTTGCACTTCCTTTTCGGGCCTCTGCAGATGATTGTGAACACGTCGGGGGGGCCGGAGTTCGCGAGCAGTGTGCGGCGGCCGCATCTGACATCGGATGCCGTGGCGCTGCTGCGGGACAACGTCACTCCACGTGAAAACGAGCTCTGGACCTCGCTGGGGGACTCGTGGACCCGCCCCGGGCTGGAGCTGTCCCCGGAGGAGGGACCCCCATACAGACCCGAGTTCTTCAGCGGCTGGGAGCCGCCGGTCACTGACCCGCAGAGCCGCGCCTGGGAGGACCCAGTTGAGAAACAGCTACAGCACGAGCGGAGGCGCCGGCAGCAAAGCGCCCCCCAGGTCGCTGTCAATGGTCACCGAGACTTGGAGCCAGAATCTGAGCCTCAGCTGGAGTCAGAGACAGCAGGAAAATGGGTCCTGTGTAATTATGACTTCCAGGCCCGCAACAGCAGTGAGCTGTCGGTCAAGCAGCGGGACGTACTGGAGGTCCTGGATGACAGTCGTAAGTGGTGGAAGGTTCGGGACCCAGCGGGGCAGGAGGGATATGTGCCCTACAACATCCTGACACCCTACCCCGGACCCCGGCT GCACCACAGCCAAAGCCCTGCCCGCAGCCTGAACAGCACTCCTCCTCCACCACCAGCCCCAGCCCCGGCCCCACCTCCAGCTCTGGCTCGGCCCCGCTGGGACAGGCCCCGCTGGGACAGCTGCGATAGCCTCAACGGCTTGGACCCCAGCGAGAAGGAGAAATTCTCCCAGATGCTCATCGTCAACGAGGAACTGCAGGCGCGCCTGGCCCAGGGCCGCTCGGGACCGAGCCGCGCAGTCCCAGGGCCCCGCGCCCCGGAACCGCAGCTCAGCCCGGGCTCGGACGCCTCCGAGGTCCGCGCCTGGCTGCAGGCCAAGGGCTTTAGCTCCGGGACCGTGGACGCGCTGGGTGTGCTGACCGGGGCGCAGCTTTTCTCGCTGCAGAAGGAGGAGCTGCGGGCGGTGAGCCCCGAGGAGGGGGCACGTGTGTACAGCCAGGTCACCGTGCAGCGCTCGCTGCTGGAGGACAAAGAGAAAGTGTCAGAGCTGGAGGCAGTGATGGAGAAGCAAAAGAAGAAGGTGGAAGGCGAGGTGGAAATGGAGGTCATTGGTATGGACTACAAGGATGACGATGACAAGGATTACAAAGACGACGATGATAAGGACTATAAGGATGATGACGACAAATGAGCTAGCACATAACTTACG GTAAATGGCCCGCCTGGCTGACCGCCCAACGACCCCCGCCCATTGACGTCAATAGTAACGCCAATAGGGAC

**Table S3.** Primers for quantitative real-time RT-PCR

| ID | Sequence(5′-3′) |
| --- | --- |
| EPS8LI-F  EPS8LI-R  TIAM1-F  TIAM1-R  TIAM2-F  TIAM2-R  MTA1-F  MTA1-R  CD147-F  CD147-R  CD44-F  CD44-R  CD82-F  CD82-R  NM23A-F  NM23A-R  TNNT2-F  TNNT2-R  TNNI3-F  TNNI3-R  TNNCI-F  TNNCI-R | CTCCACGTGAAAACGAGCTCTG  CGCTGAAGAACTCGGGTCTGTA GGAGCAGGTTTTCTTCTCTGTGG  TACAGCTTCGGTTCCCTCTCCA  CTCCTAACCAGTCCCAACTGCT  ACCTGATCCAGAGTGCCATCTG  CCAGGACCAAACCCGCAGTAACA  GTCAGCTTCGTCGTGTGCAGAT  GGCTGTGAAGTCGTCAGAACAC  ACCTGCTCTCGGAGCCGTTCA  CCAGAAGGAACAGTGGTTTGCG  ACTGTCCTCTGGGCTTGGTGTT  GGAAGAGGACAACAGCCTTTCTG  ATGATGCCCAGGTTCTCCTGCA  ACCATCCGTGGAGACTTCTGCA  ACCAGTTCCTCAGGGTGAAACC  AAGAGGCAGACTGAGCGGGAAA  AGATGCTCTGCCACAGCTCCTT  CGTGTGGACAAGGTGGATGAAG  GCCGCTTAAACTTGCCTCGAAG  AGACCATCACGGAGGACGACAT  GGTGAAGGTCAGCATCTACTCC |

**Table S4 Partial enrichment codes for KEGG and GO**

| GO | KEGG |
| --- | --- |
| goCC <- enrichGO(hg$ENTREZID,OrgDb = org.Hs.eg.db, ont='CC',pAdjustMethod = 'BH',pvalueCutoff = 0.05, qvalueCutoff = 0.2,keyType = 'ENTREZID')  goBP <- enrichGO(hg$ENTREZID,OrgDb = org.Hs.eg.db, ont='BP',pAdjustMethod = 'BH',pvalueCutoff = 0.05, qvalueCutoff = 0.2,keyType = 'ENTREZID')  goMF <- enrichGO(hg$ENTREZID,OrgDb = org.Hs.eg.db, ont='MF',pAdjustMethod = 'BH',pvalueCutoff = 0.05, qvalueCutoff = 0.2,keyType = 'ENTREZID') | kegg <- enrichKEGG(hg$ENTREZID, organism = 'hsa', keyType = 'kegg', pvalueCutoff = 0.05, pAdjustMethod = 'BH', minGSSize = 3, maxGSSize = 500, qvalueCutoff = 0.2, use_internal_data = FALSE)# |

**Table S5. The relationship between the expression of EPS8L1-mRNA in tissue and clinicopathological indicators in 379 patients with epithelial ovarian cancer**

| Characteristic | Low expression of EPS8L1 | High expression of EPS8L1 | p |
| --- | --- | --- | --- |
| n | 189 | 190 |  |
| FIGO stage, n (%) |  |  | 0.042 |
| Stage I+ II | 10 (2.7%) | 14 (3.7%) |  |
| Stage III+ IV | 178 (47.4%) | 138 (46.3%) |  |
|  |  |  |  |
| Histologic grade, n (%) | 1 (0.3%) | 0 (0%) | 0.285 |
| G1 | 26 (7%) | 19 (5.1%) |  |
| G2 | 158 (42.8%) | 164 (44.4%) |  |
| G3 | 1 (0.3%) | 0 (0%) |  |
| G4 |  |  |  |
| Venous invasion, n (%) | 22 (21%) | 19 (18.1%) | 1.000 |
| No | 34 (32.4%) | 30 (28.6%) |  |
| Yes |  |  |  |
| Lymphatic invasion, n (%) | 29 (19.5%) | 19 (12.8%) | 0.284 |
| No | 50 (33.6%) | 51 (34.2%) |  |
| Yes |  |  |  |
| Age, n (%) | 103 (27.2%) | 105 (27.7%) | 0.963 |
| <=60 | 86 (22.7%) | 85 (22.4%) |  |
| >60 | 59 (51, 70) | 58 (51, 67) |  |
| Age, meidan (IQR) |  |  | 0.494 |


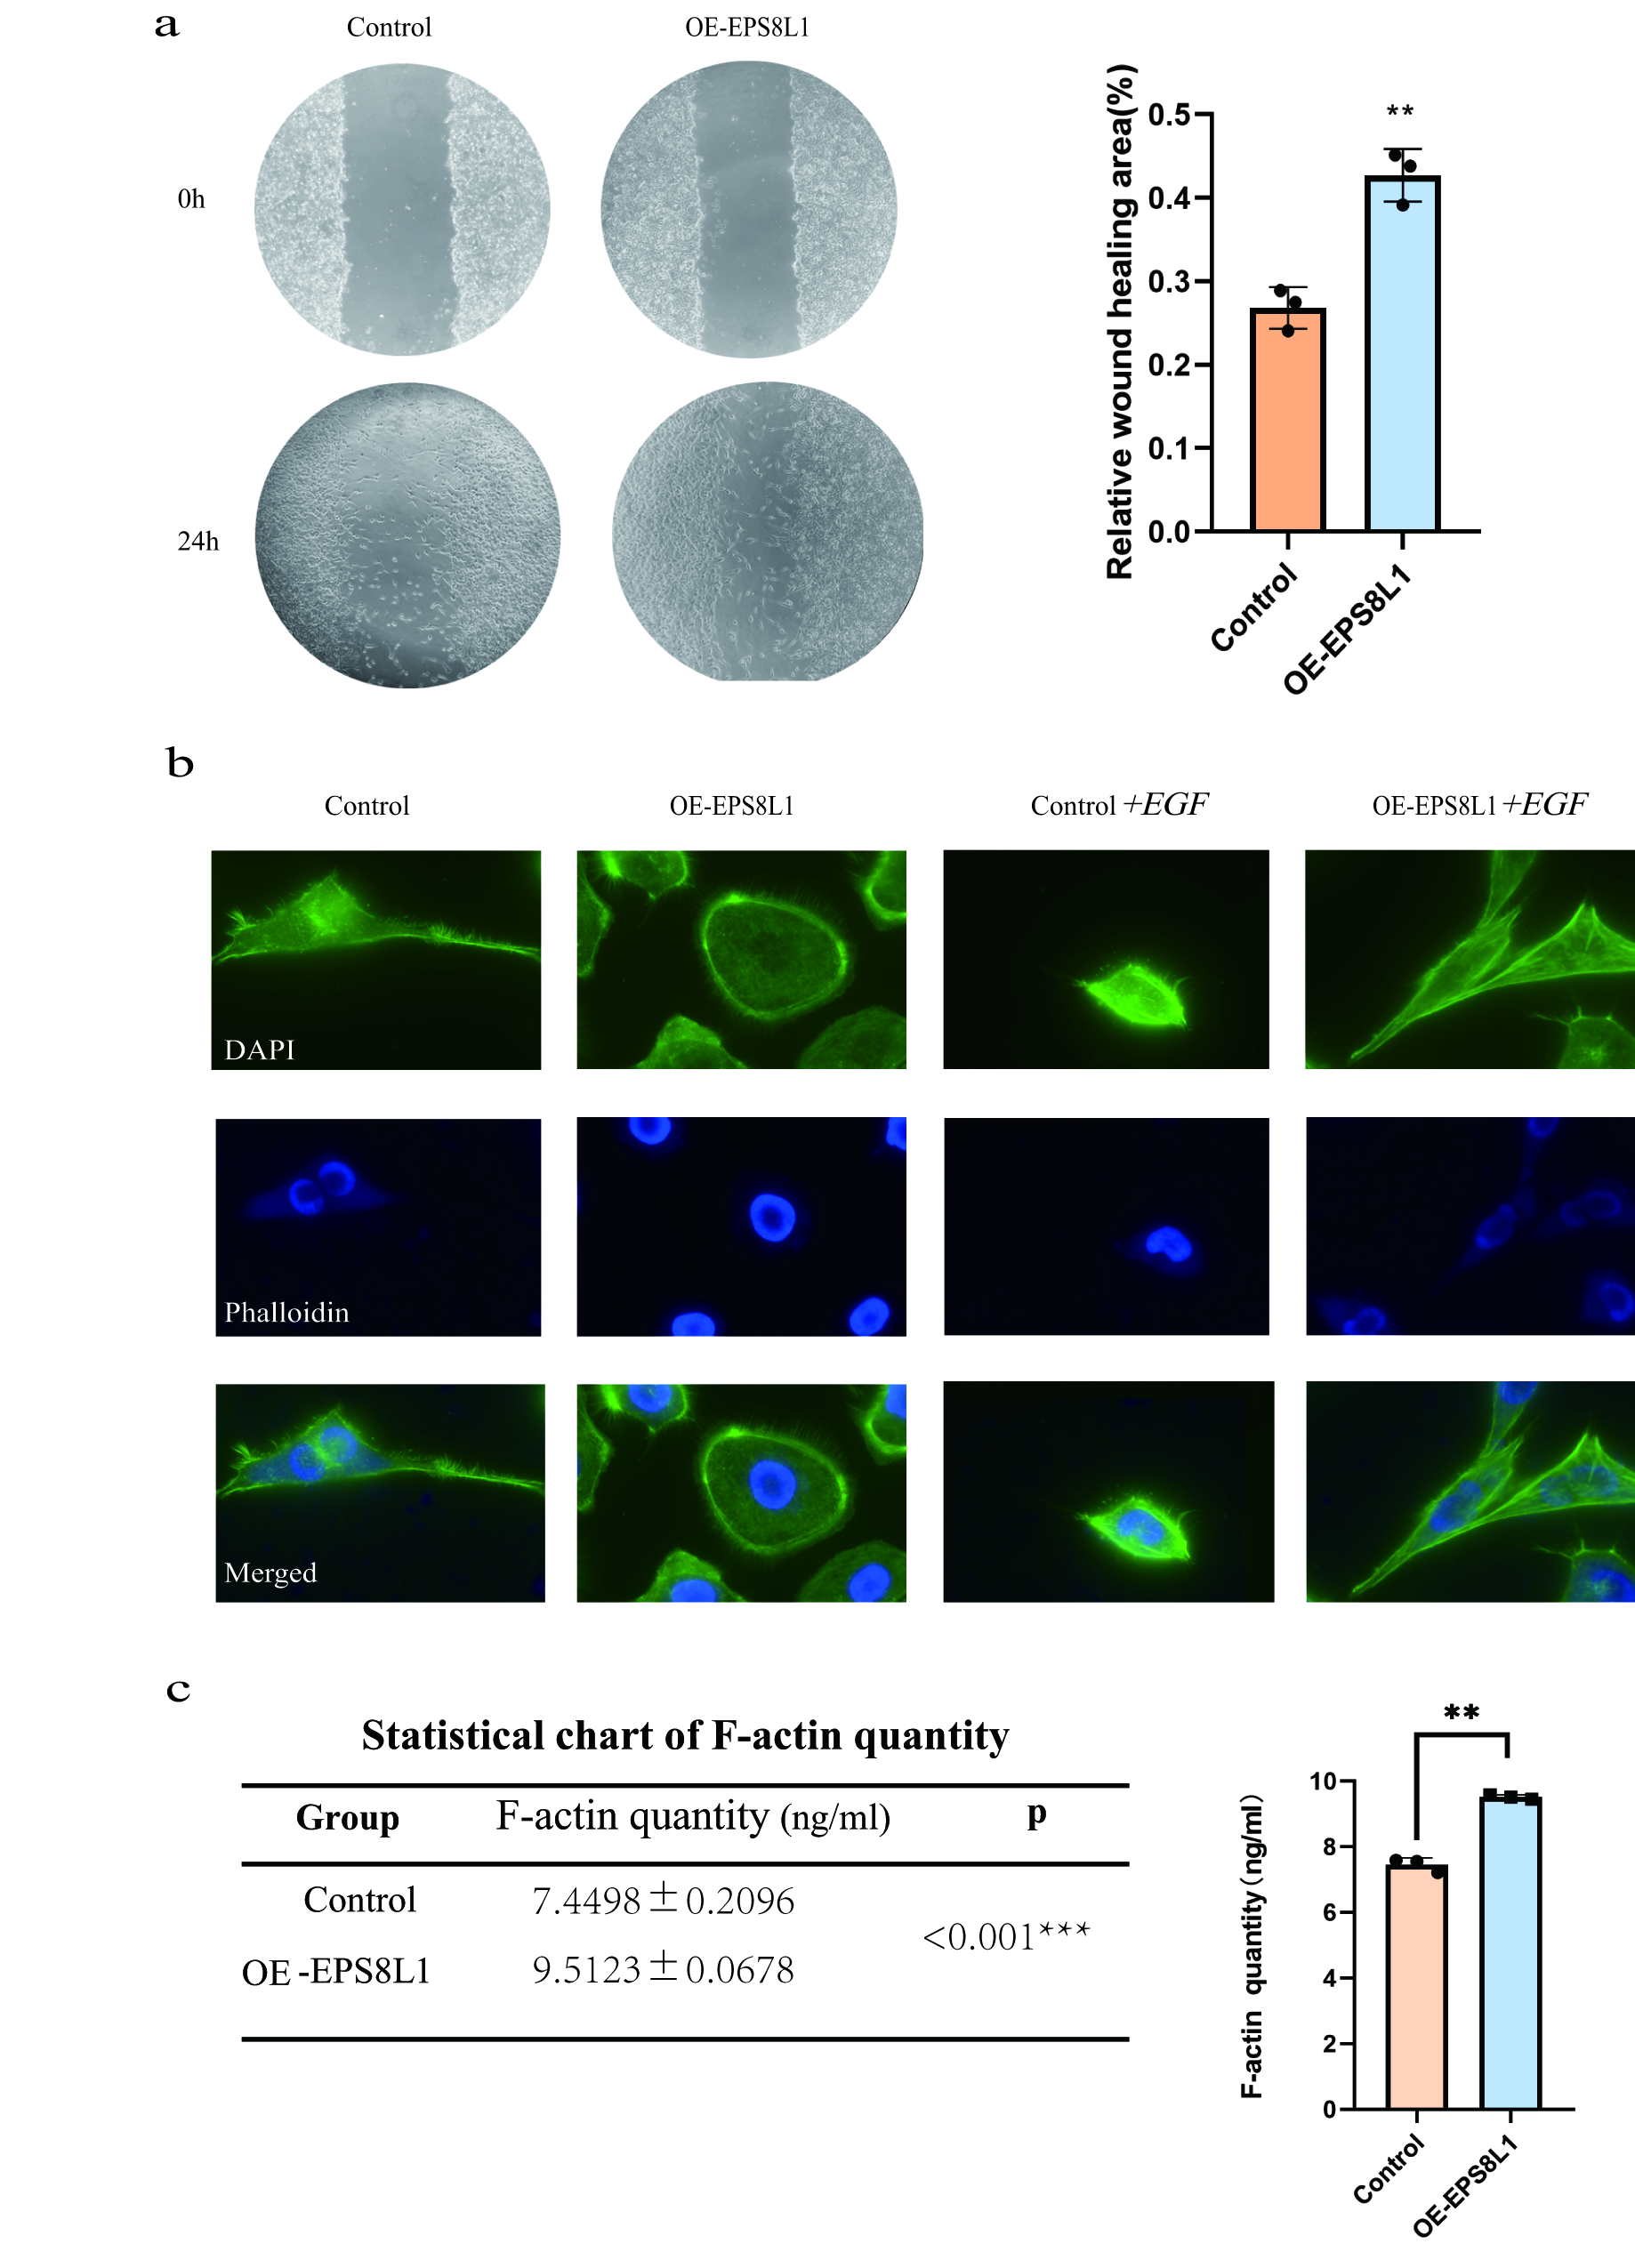


**Fig.S1. Over-expression of EPS8L1 induce cell migration and cytoskeleton reorganization.** (a) The scratch healing assay of control and OE-EPS8L1 SKOV-3 cells at 0 h and 24 h. Images were obtained via microscopy and analyzed with Image J. Data are shown as the mean ± SE, **P* < 0.05. (b) Fluorescent micrographs of cell staining with phalloidin (for F-actin, green), DAPI (for nuclei, blue), and the merged images of control and OE-EPS8L1 SKOV-3 cells (alone or with 40 ng/mL EGF). Images were acquired under identical parameters with a 10 μm scale bar. (c) Quantification of actin in OE-EPS8L1 and control groups were performed with an F-actin ELISA kit. Data are shown as the mean ± SEM; n ≥ 3. ****P* < 0.001.


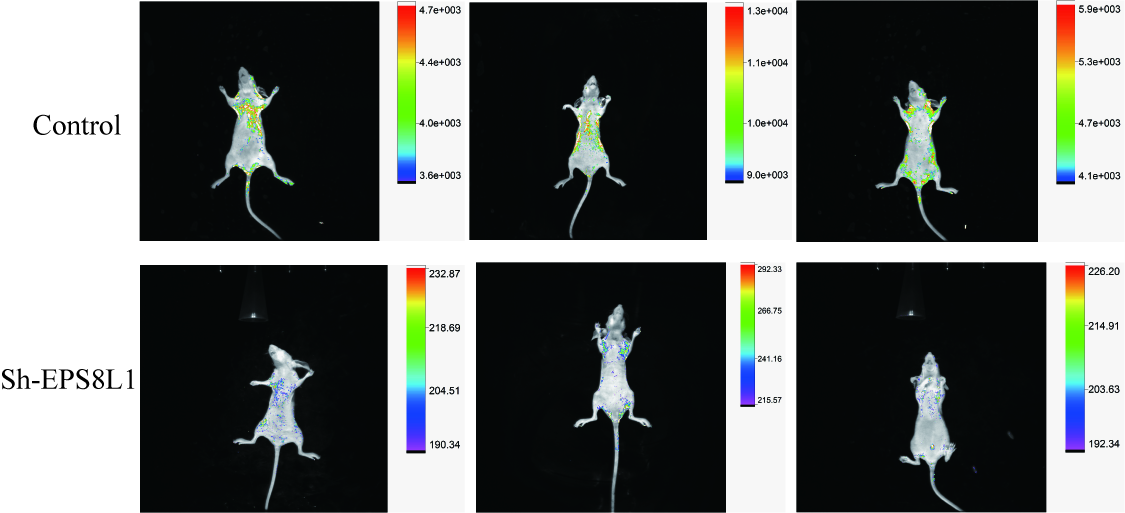


a


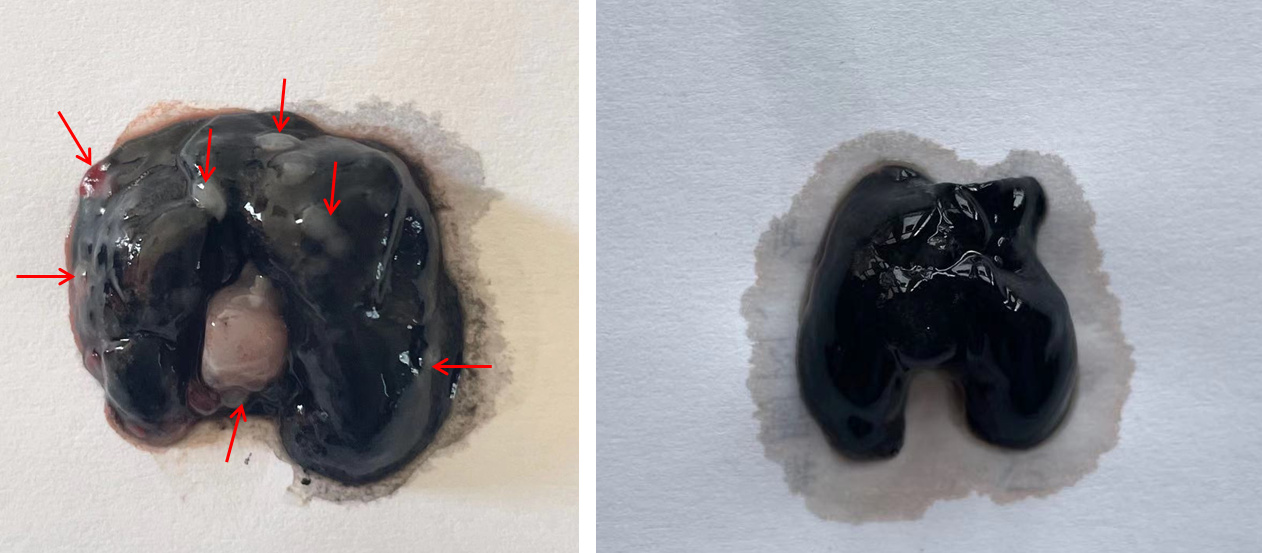


Control

Sh-EPS8L1

b

**Fig.S2. Knockdown of EPS8L1 inhibits the colonization and metastasis of SKOV-3 ovarian cancer cells *in vivo*.(a)**GFP-labelled SKOV-3 cells with Sh-EPS8L1 or normal expression were injected into nude mice via tail vein for 8 weeks to allow metastatic colonization (Multiple repetition was performed).**(b)** obtained lungs were stained with ink to identify the metastatic lung colonies (arrows).


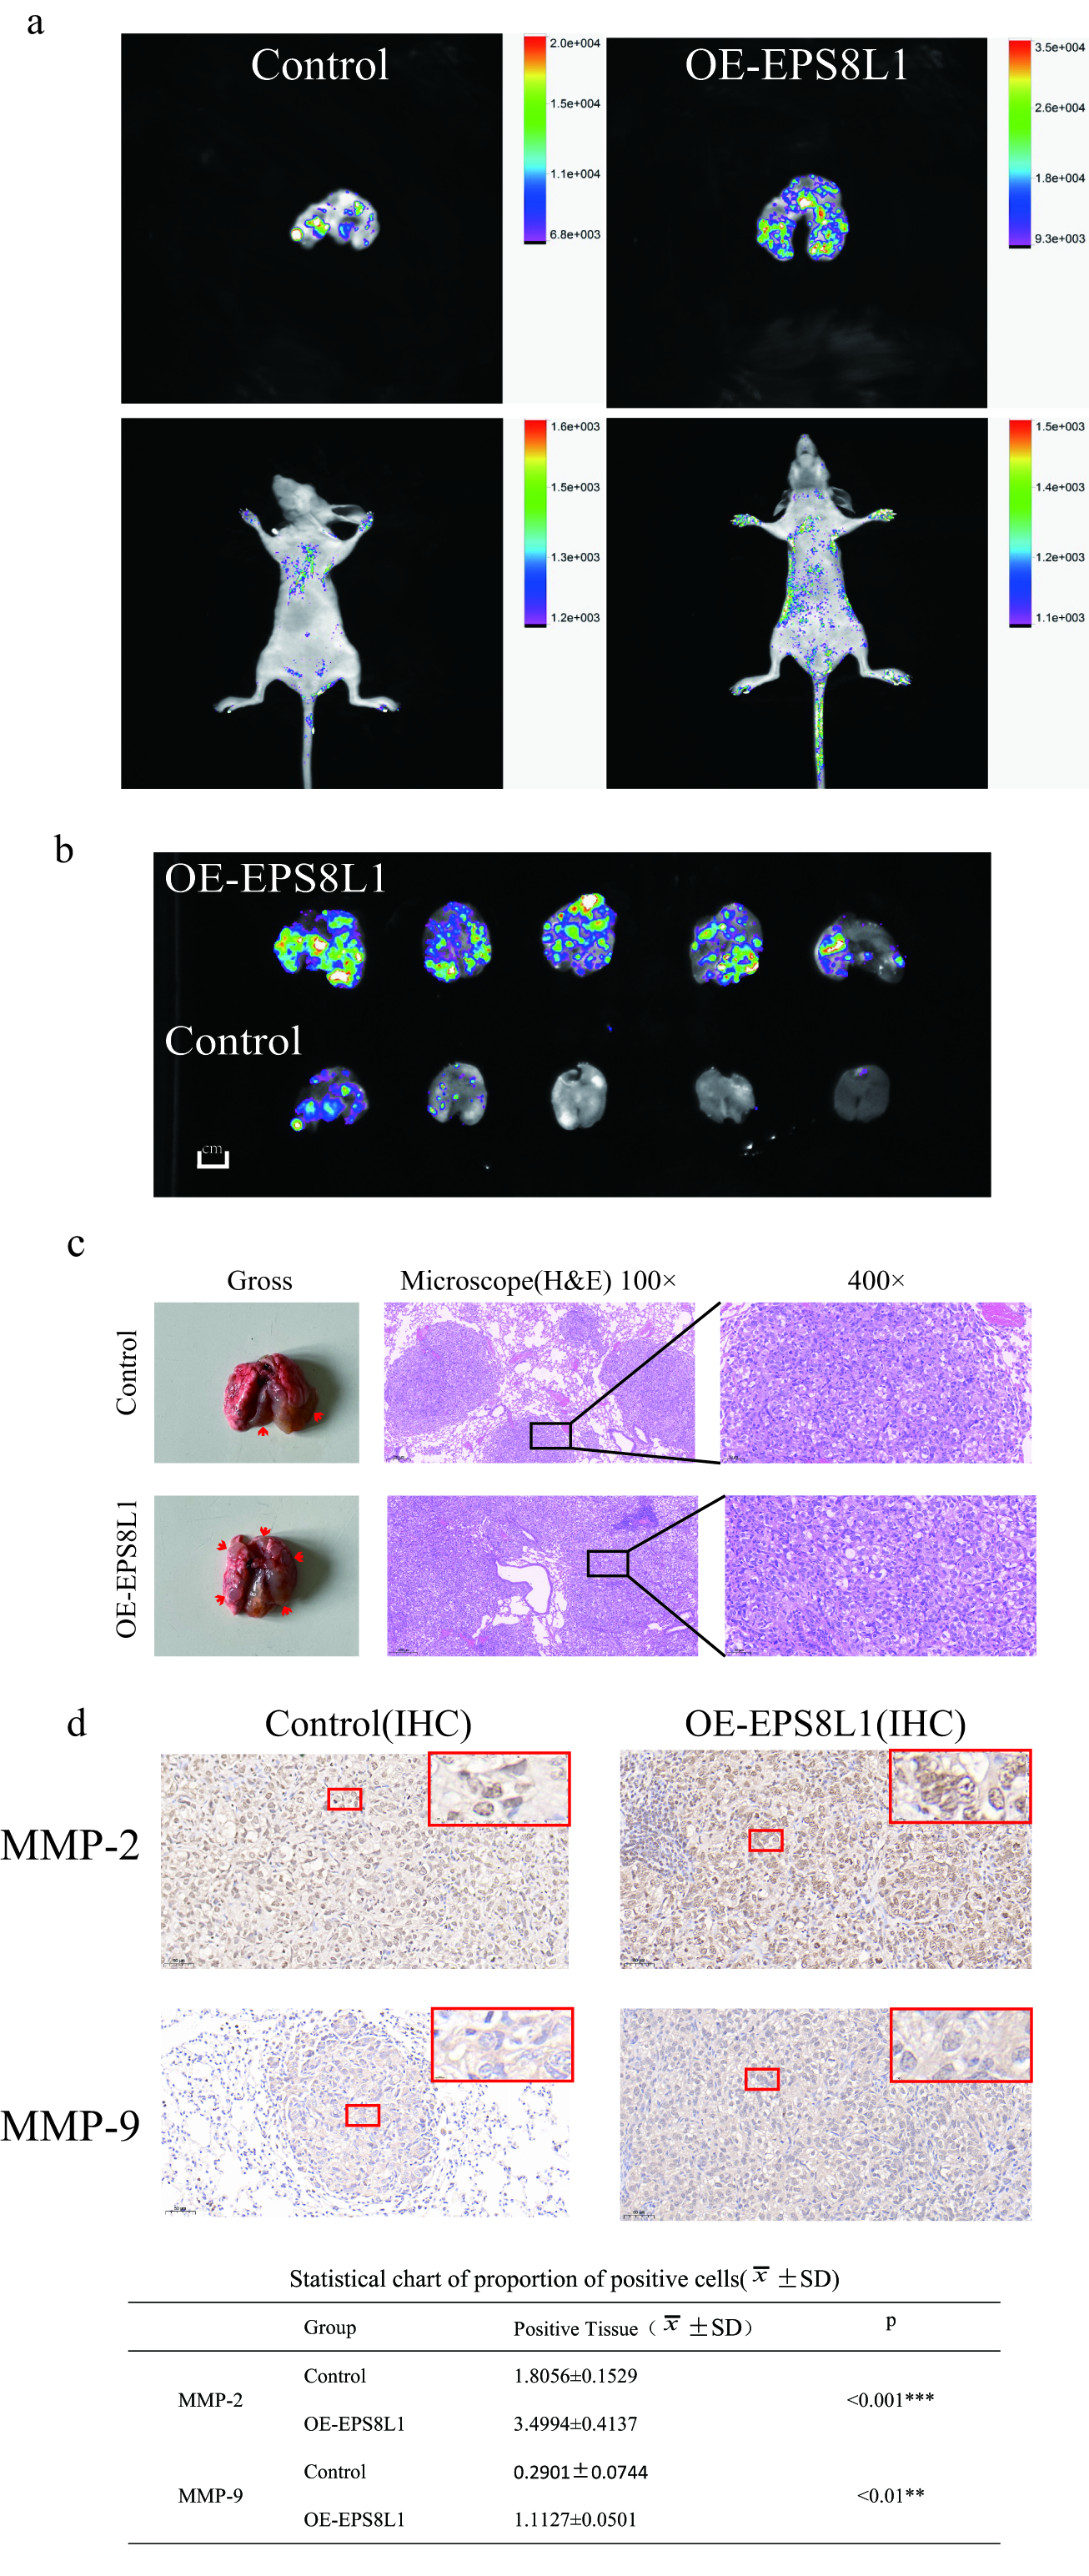


**Fig.S3.** **EPS8L1 overexpression induce the cell colonization of ovarian tumor in vivo.** (a) Fluorescent images of control and OE-EPS8L1 SKOV-3 cells carrying GFP fluorescence in nude mice were taken by a Bruker in vivo FX imager to observe the fluorescence distribution. (b) The fluorescent intensity of lung tissue in xenograft mice with GFP-labeled control and OE-EPS8L1 cells. (c) Tumor colonization on lungs (indicated by arrows) and H&E staining of lung nodules (× 100 and × 400 magnification), with three slices per mouse. Data are shown as the median ± SE; ***P*< 0.01 (n = four to seven mice). (d) Immunohistochemistry analysis of MMP-2 and MMP-9 in lung tissues (× 200 and × 400 magnification). The lung tissues of three mice were randomly selected in each group for analysis using Image J, and the proportion of positive cells was used as an indicator to compare with the control group. Data are shown as the mean ± SE, ***P* < 0.01, ****P* < 0.001.


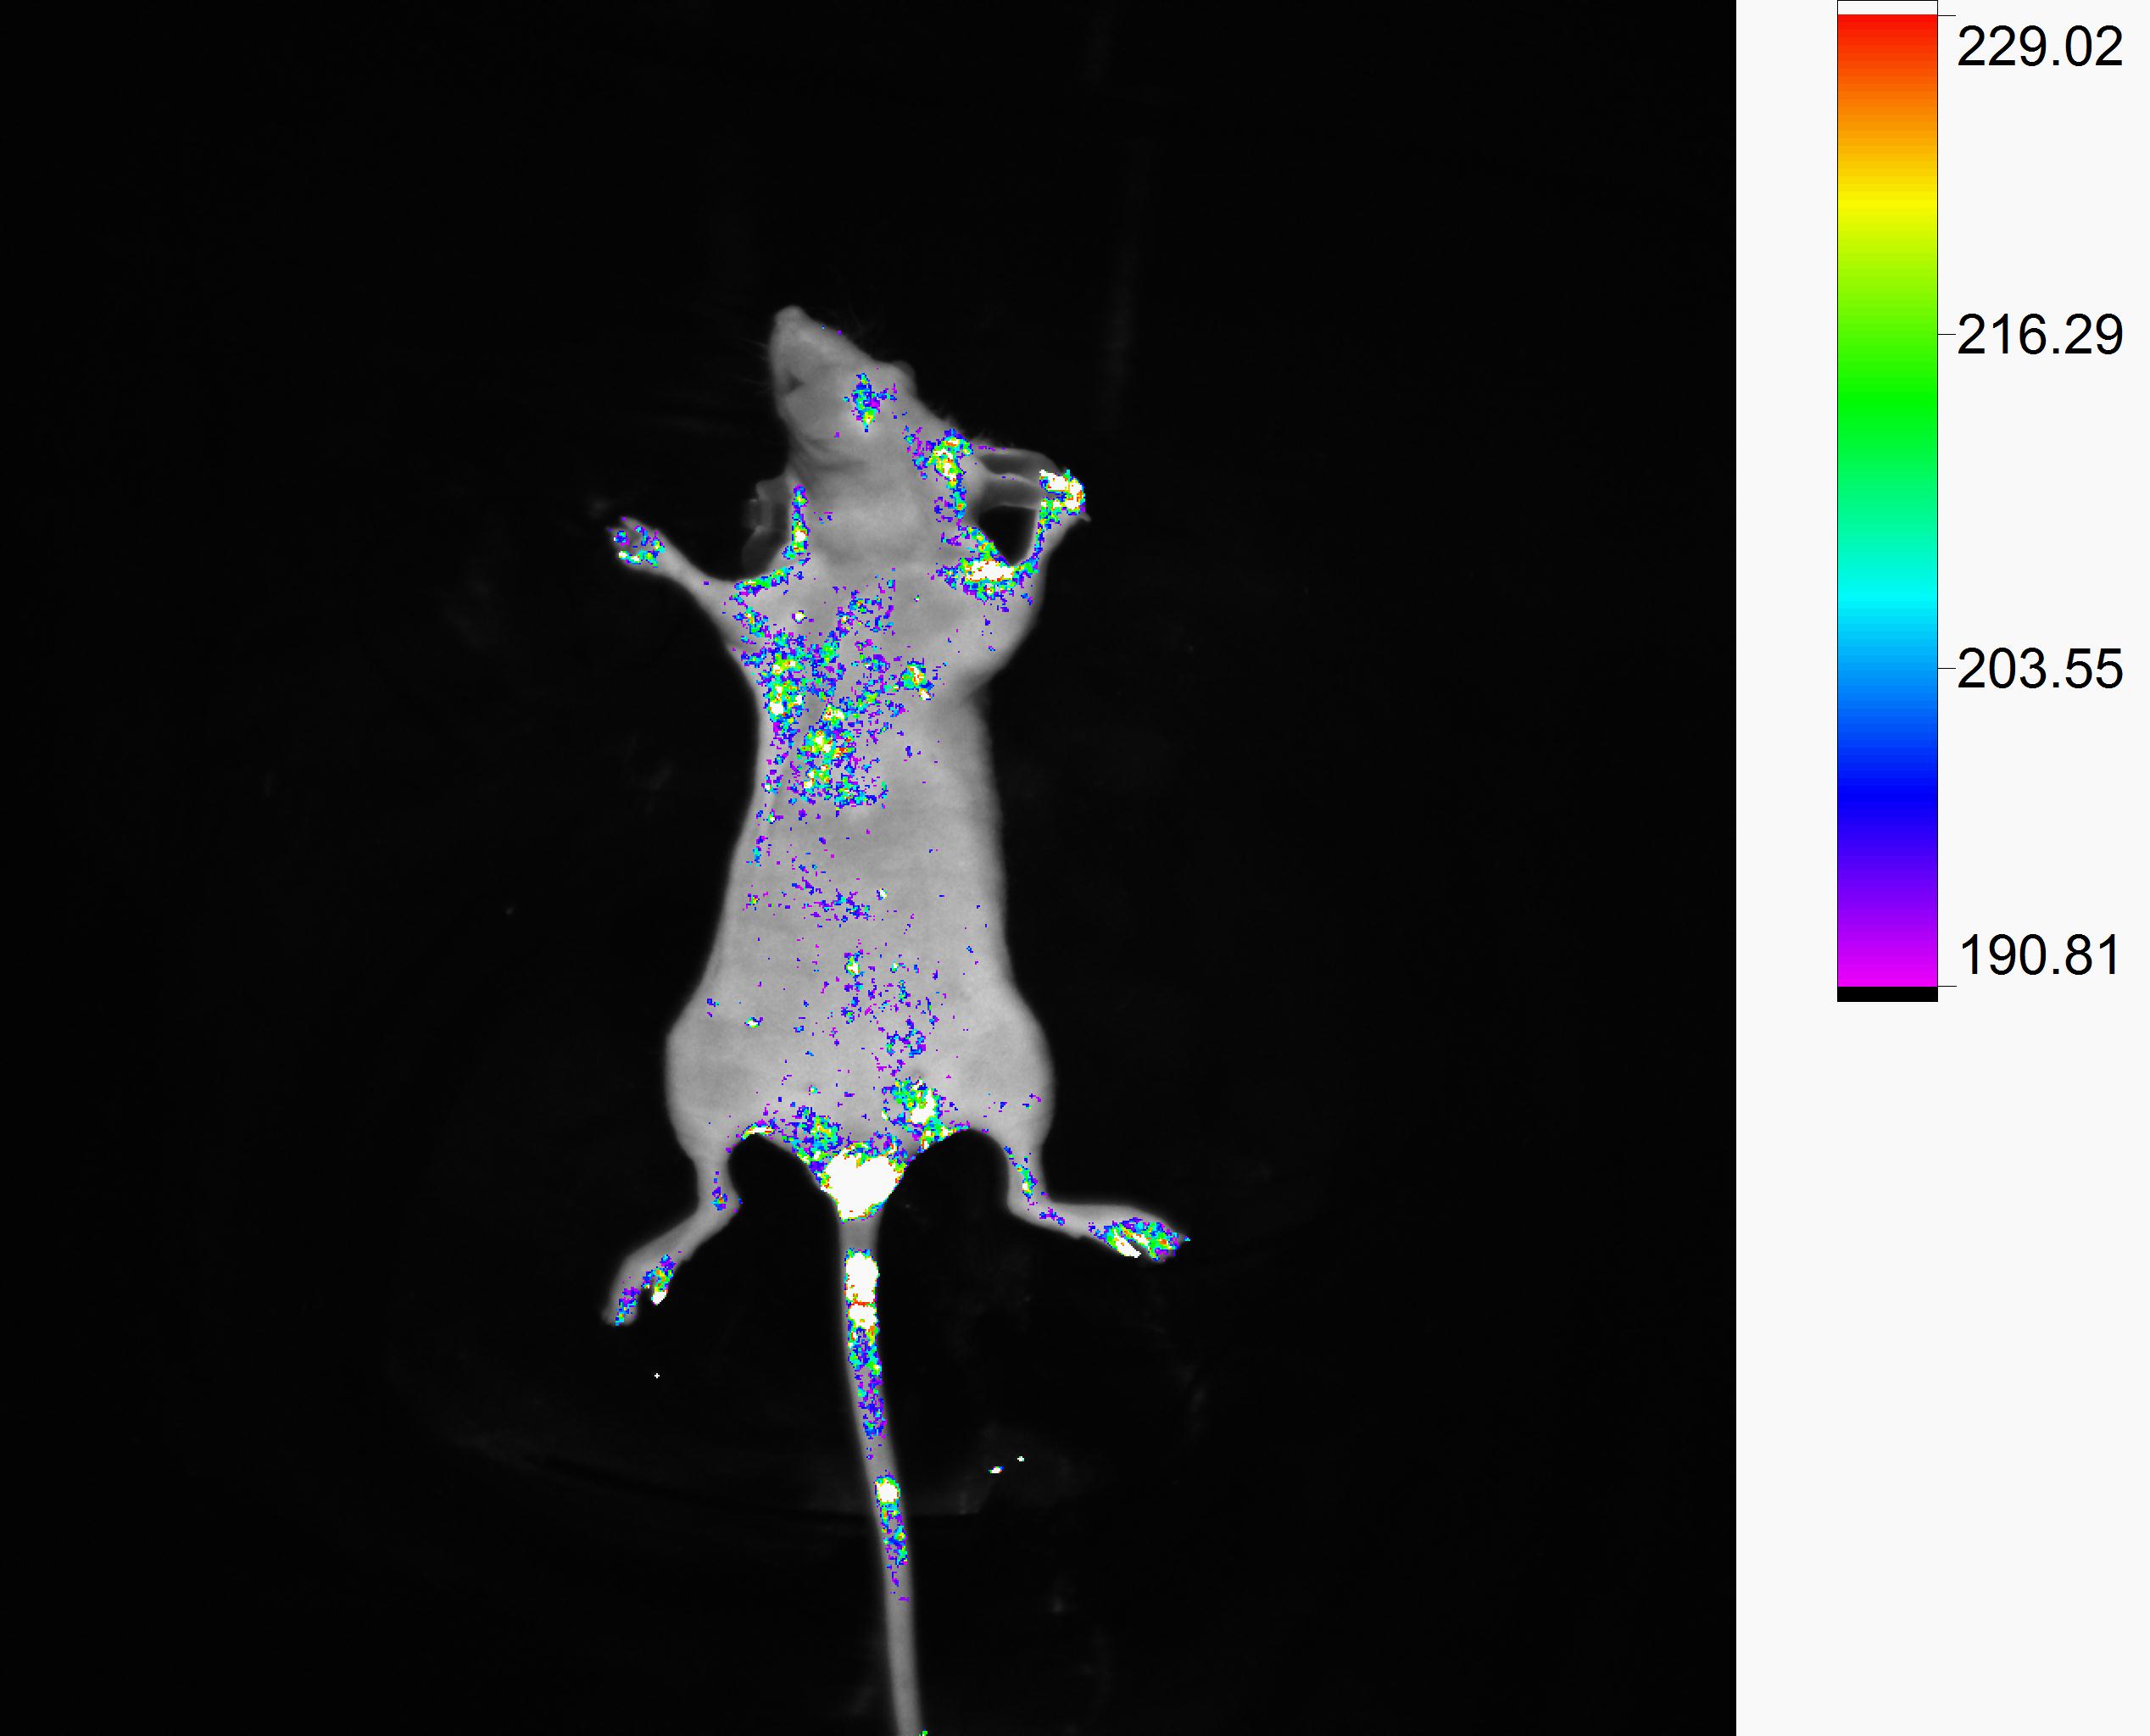

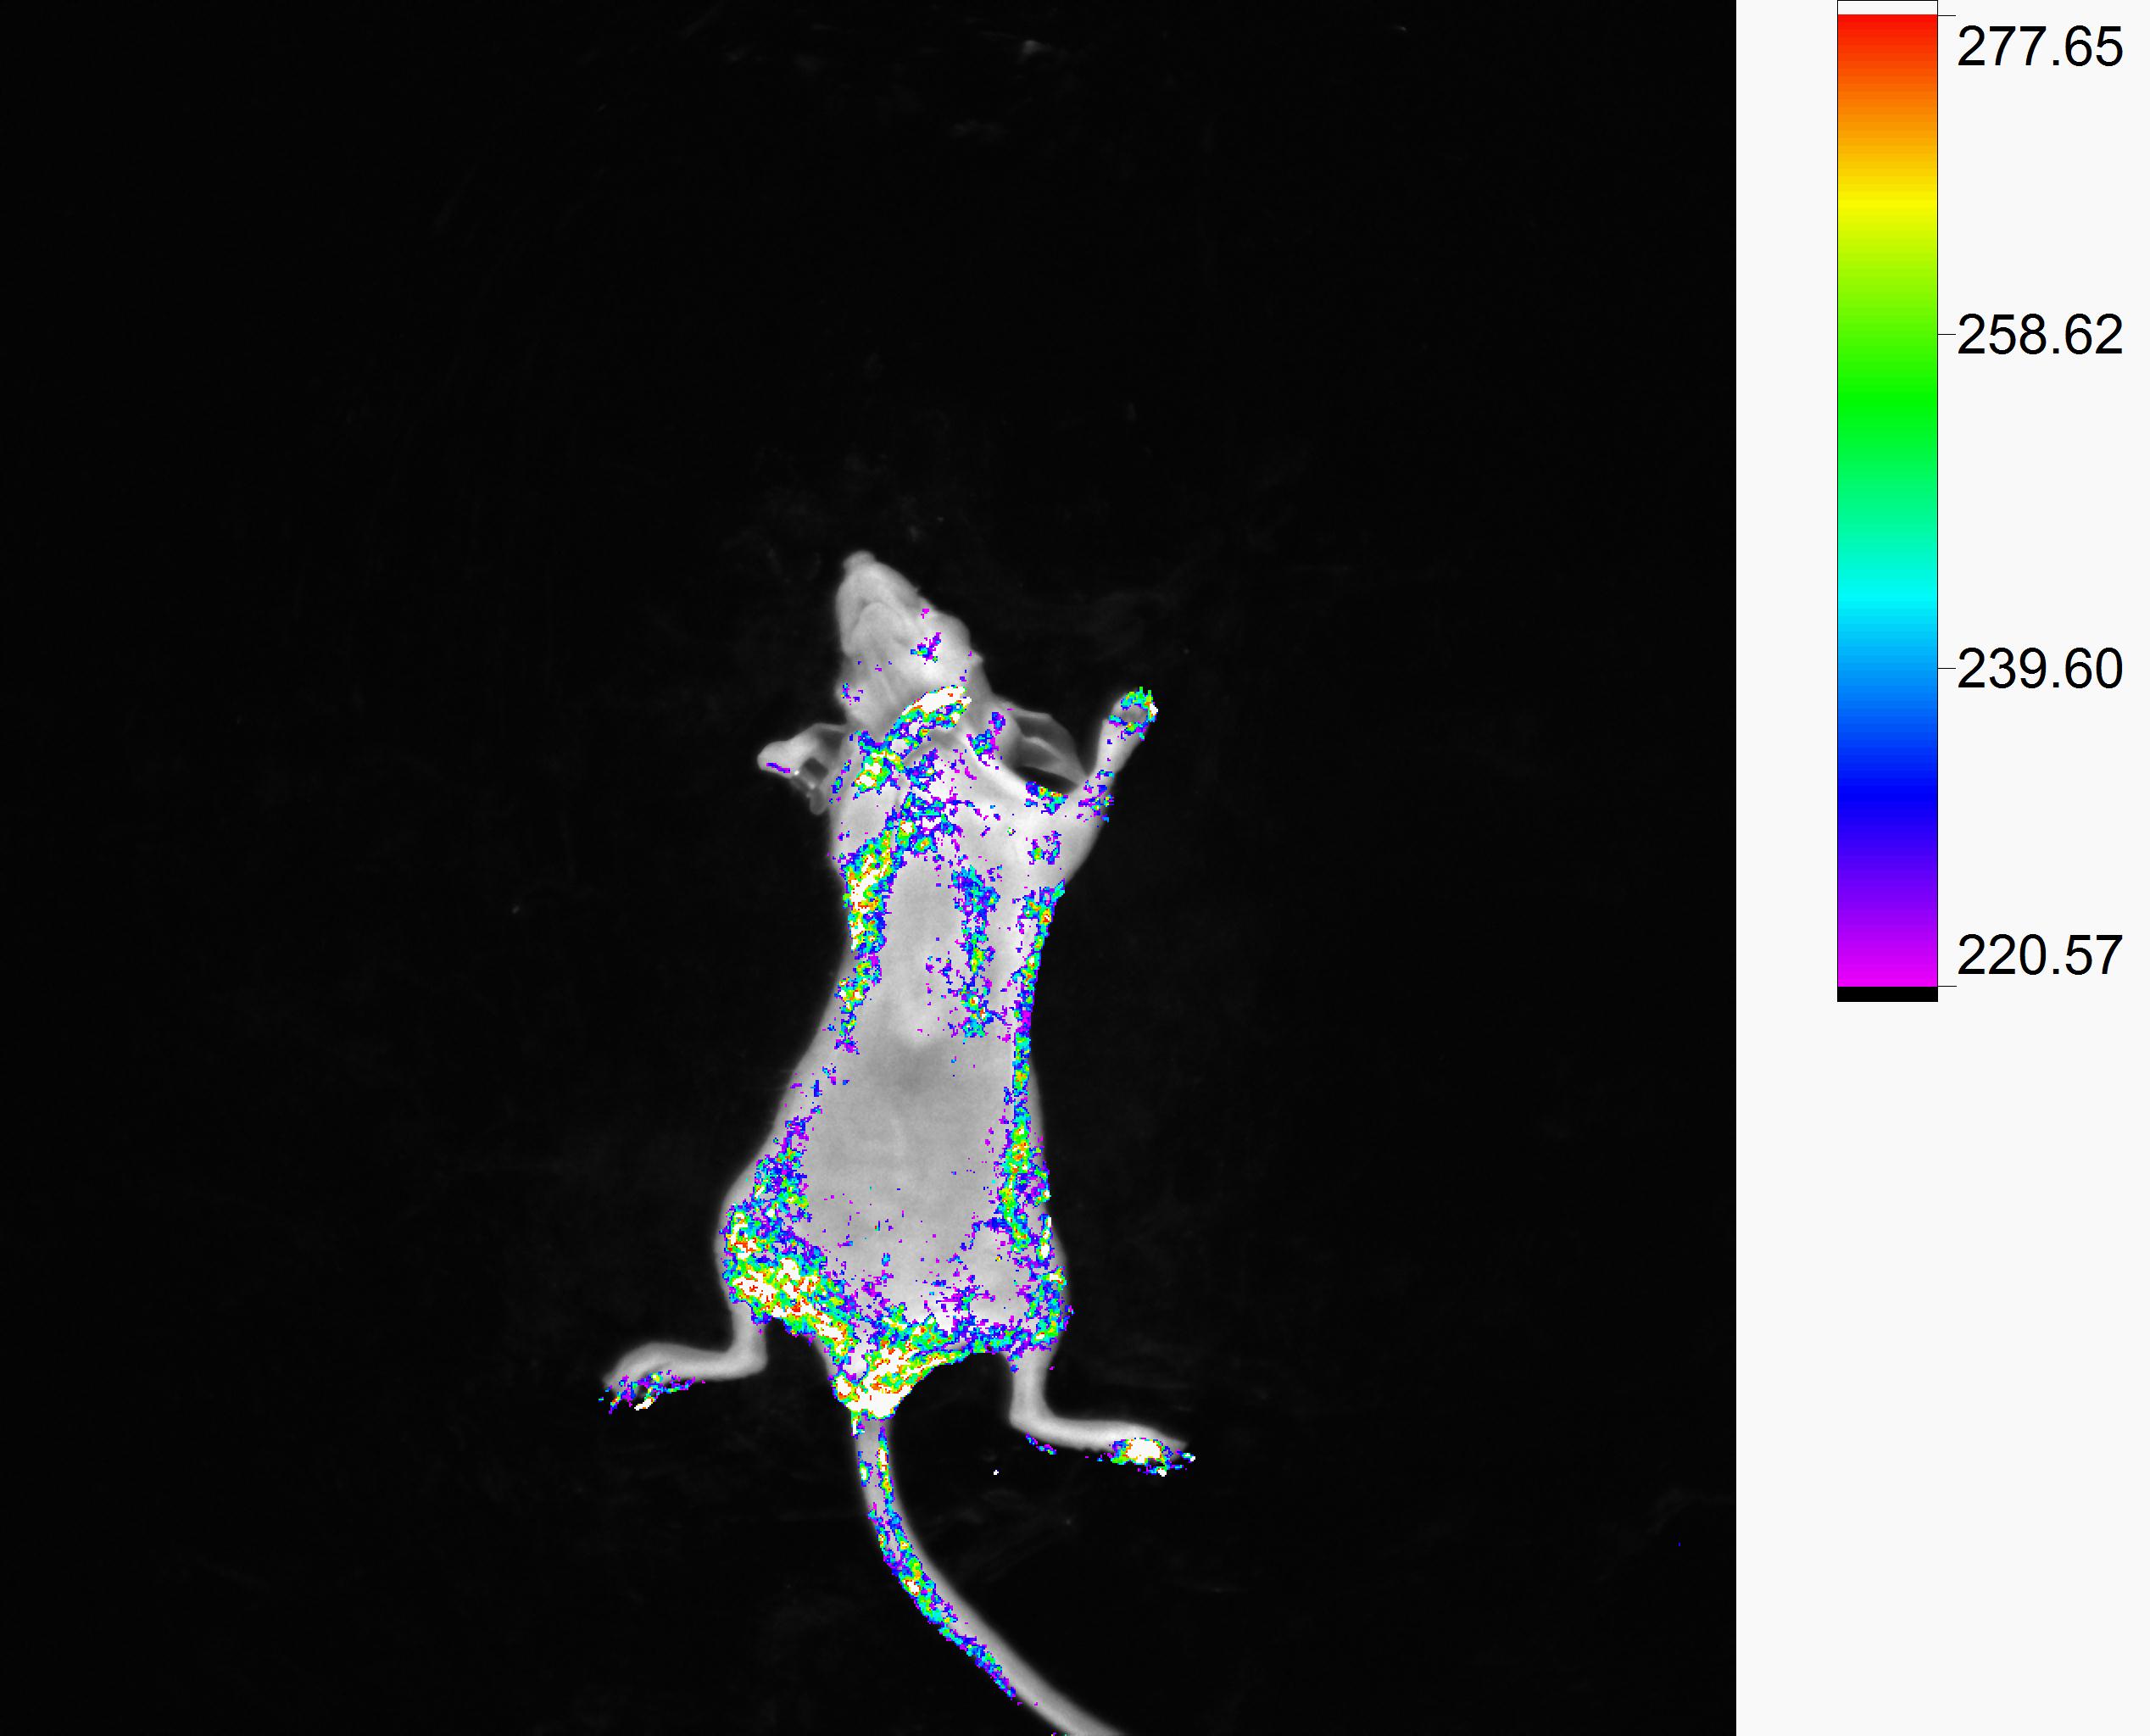

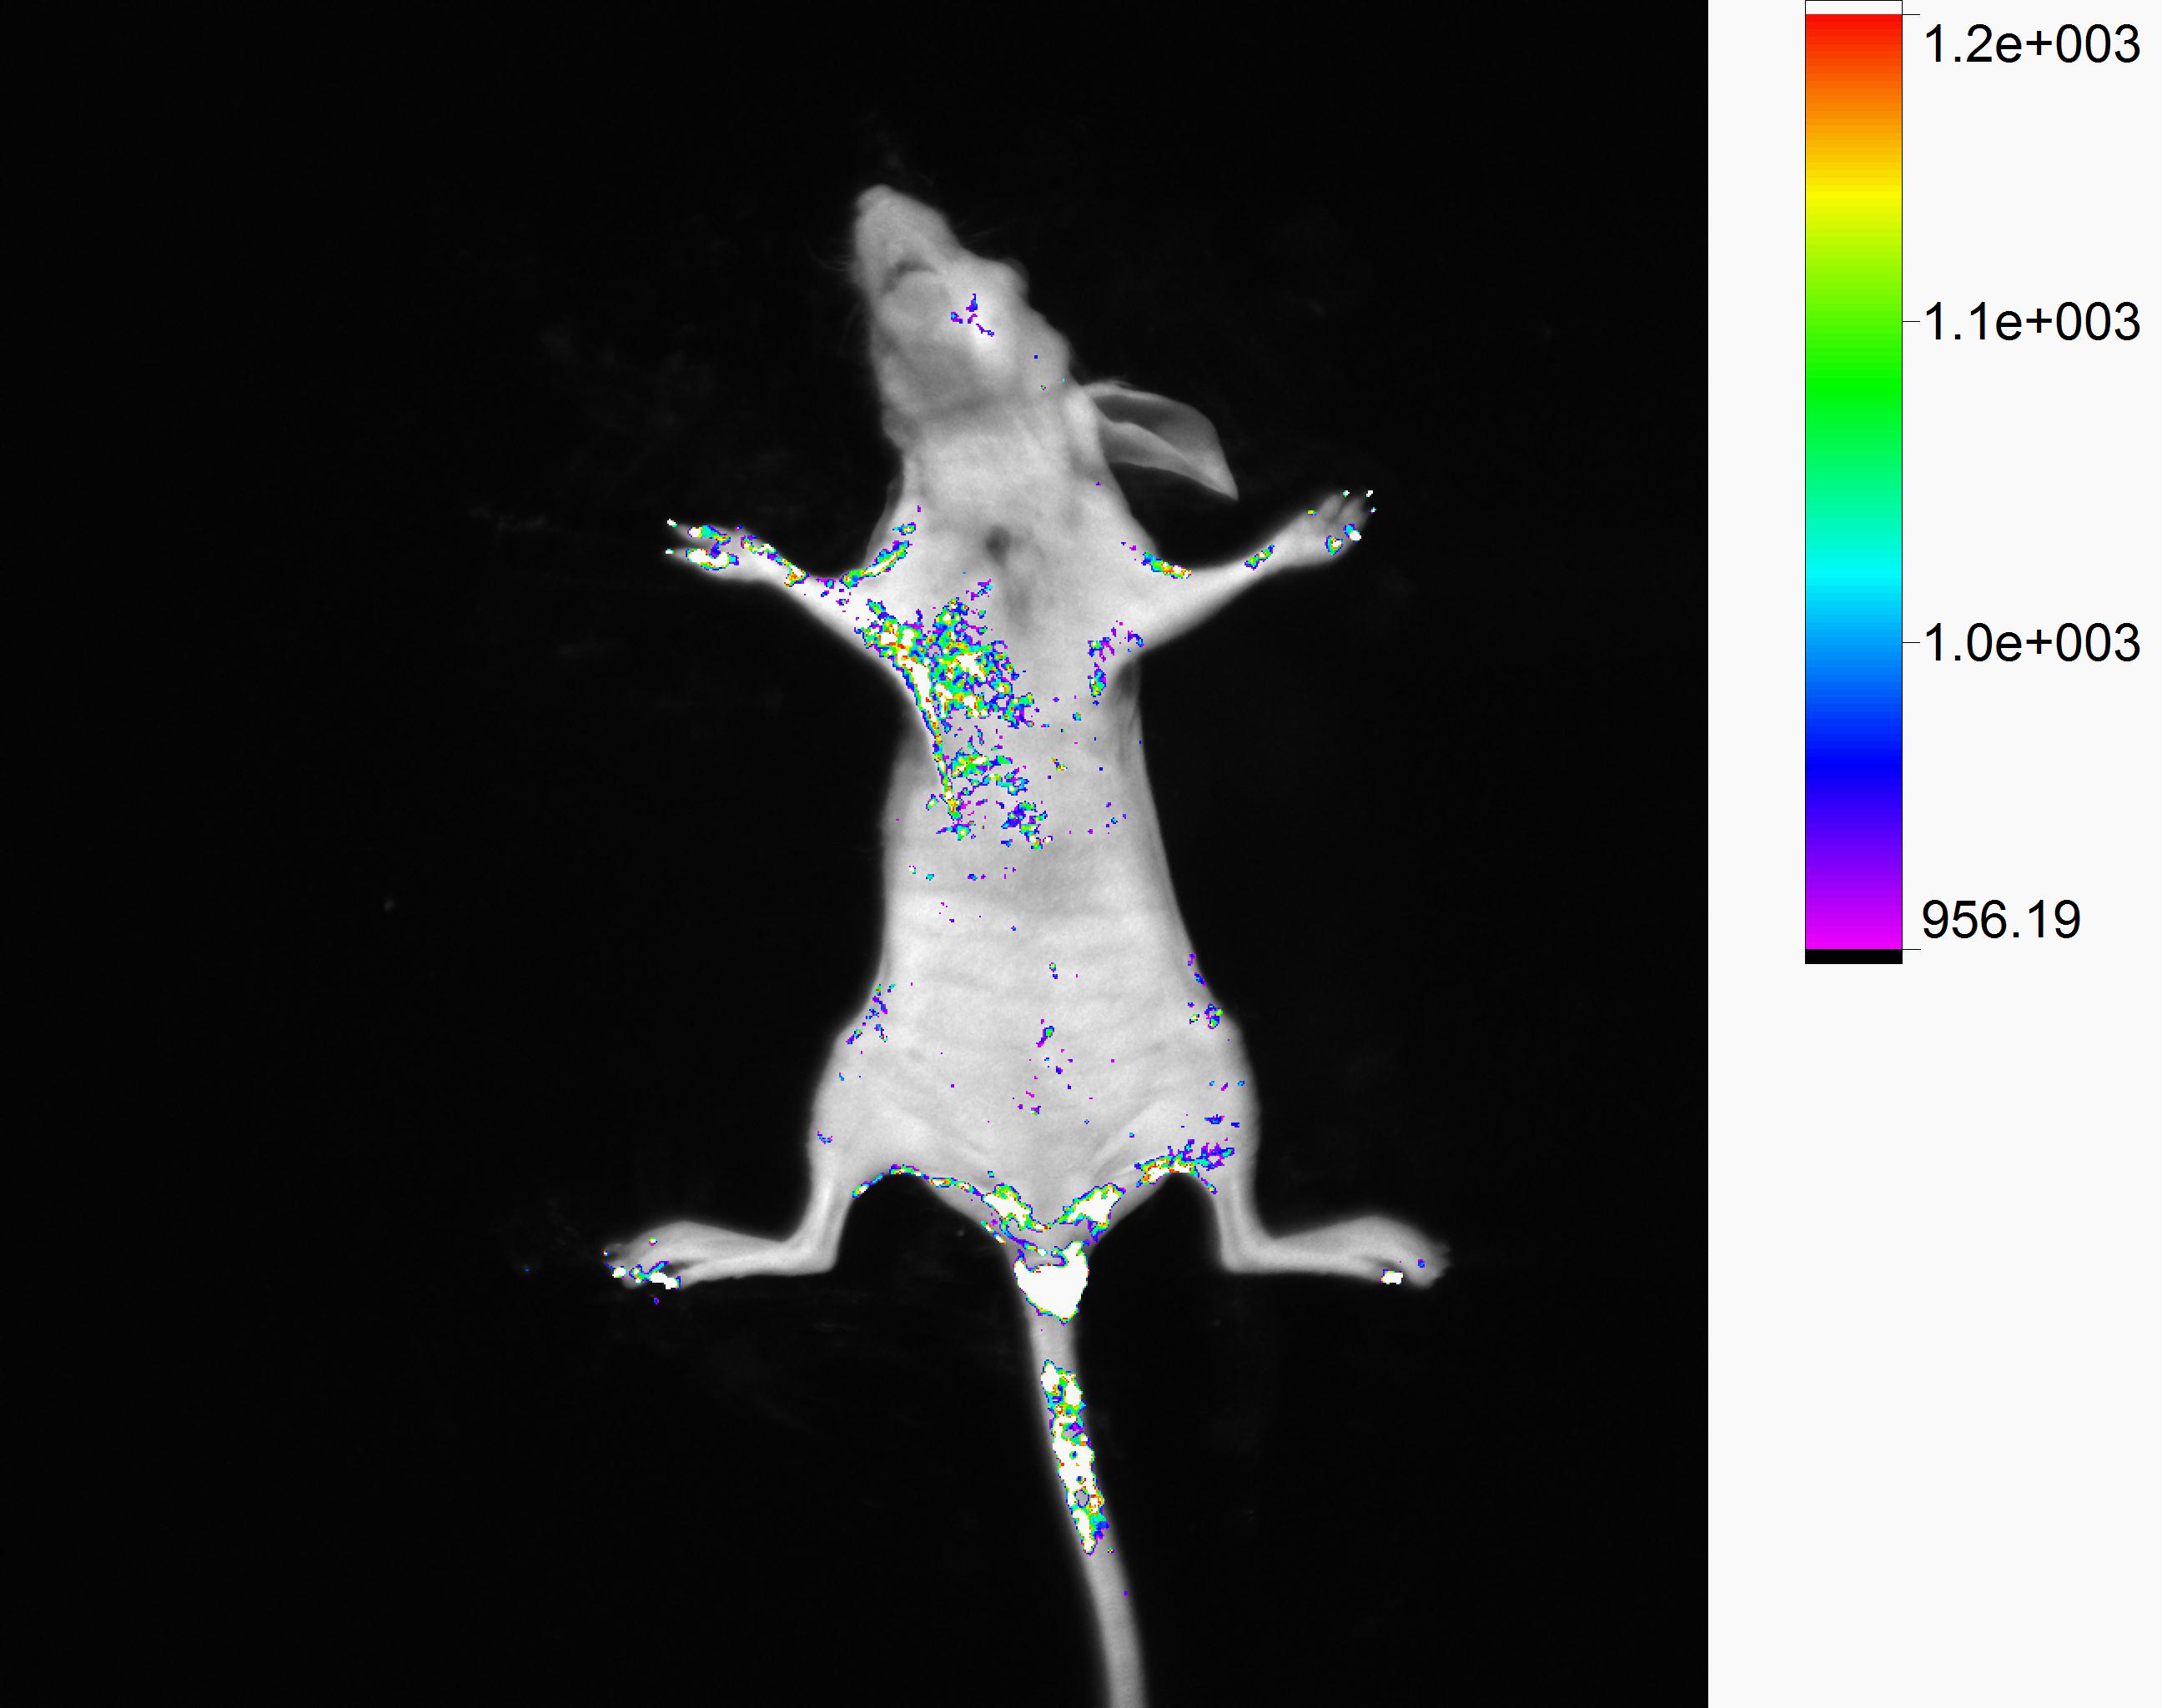

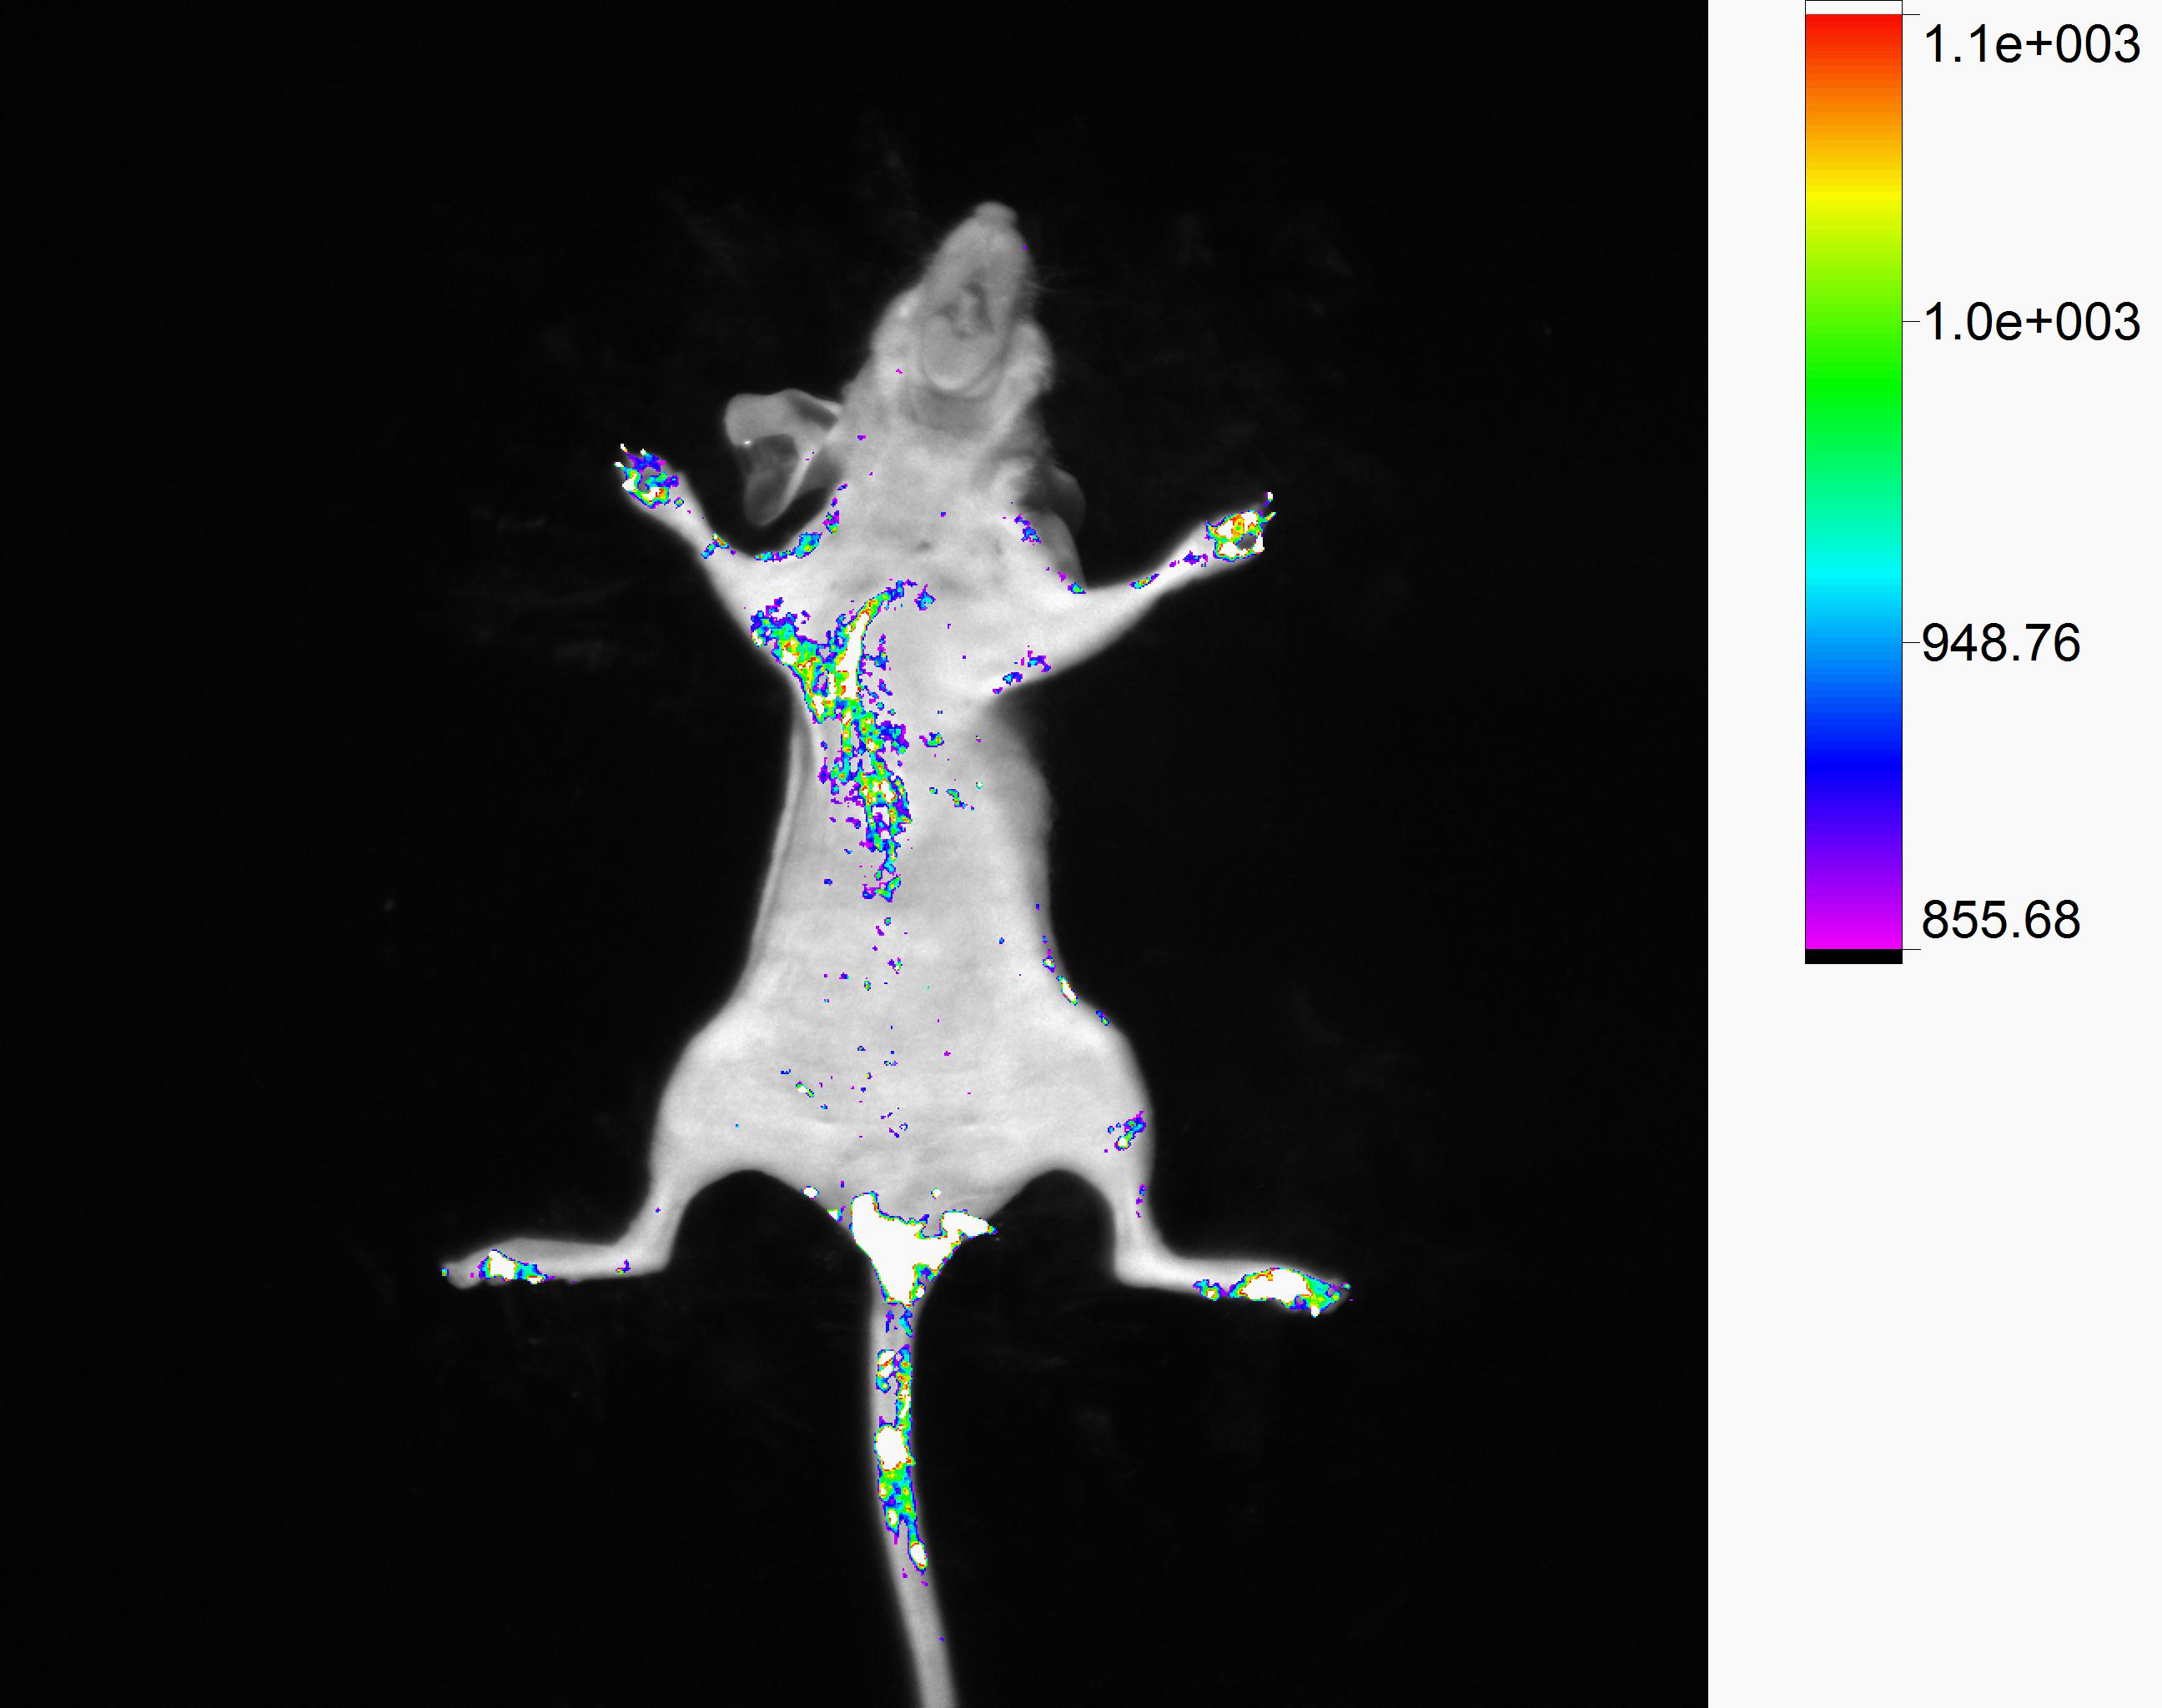

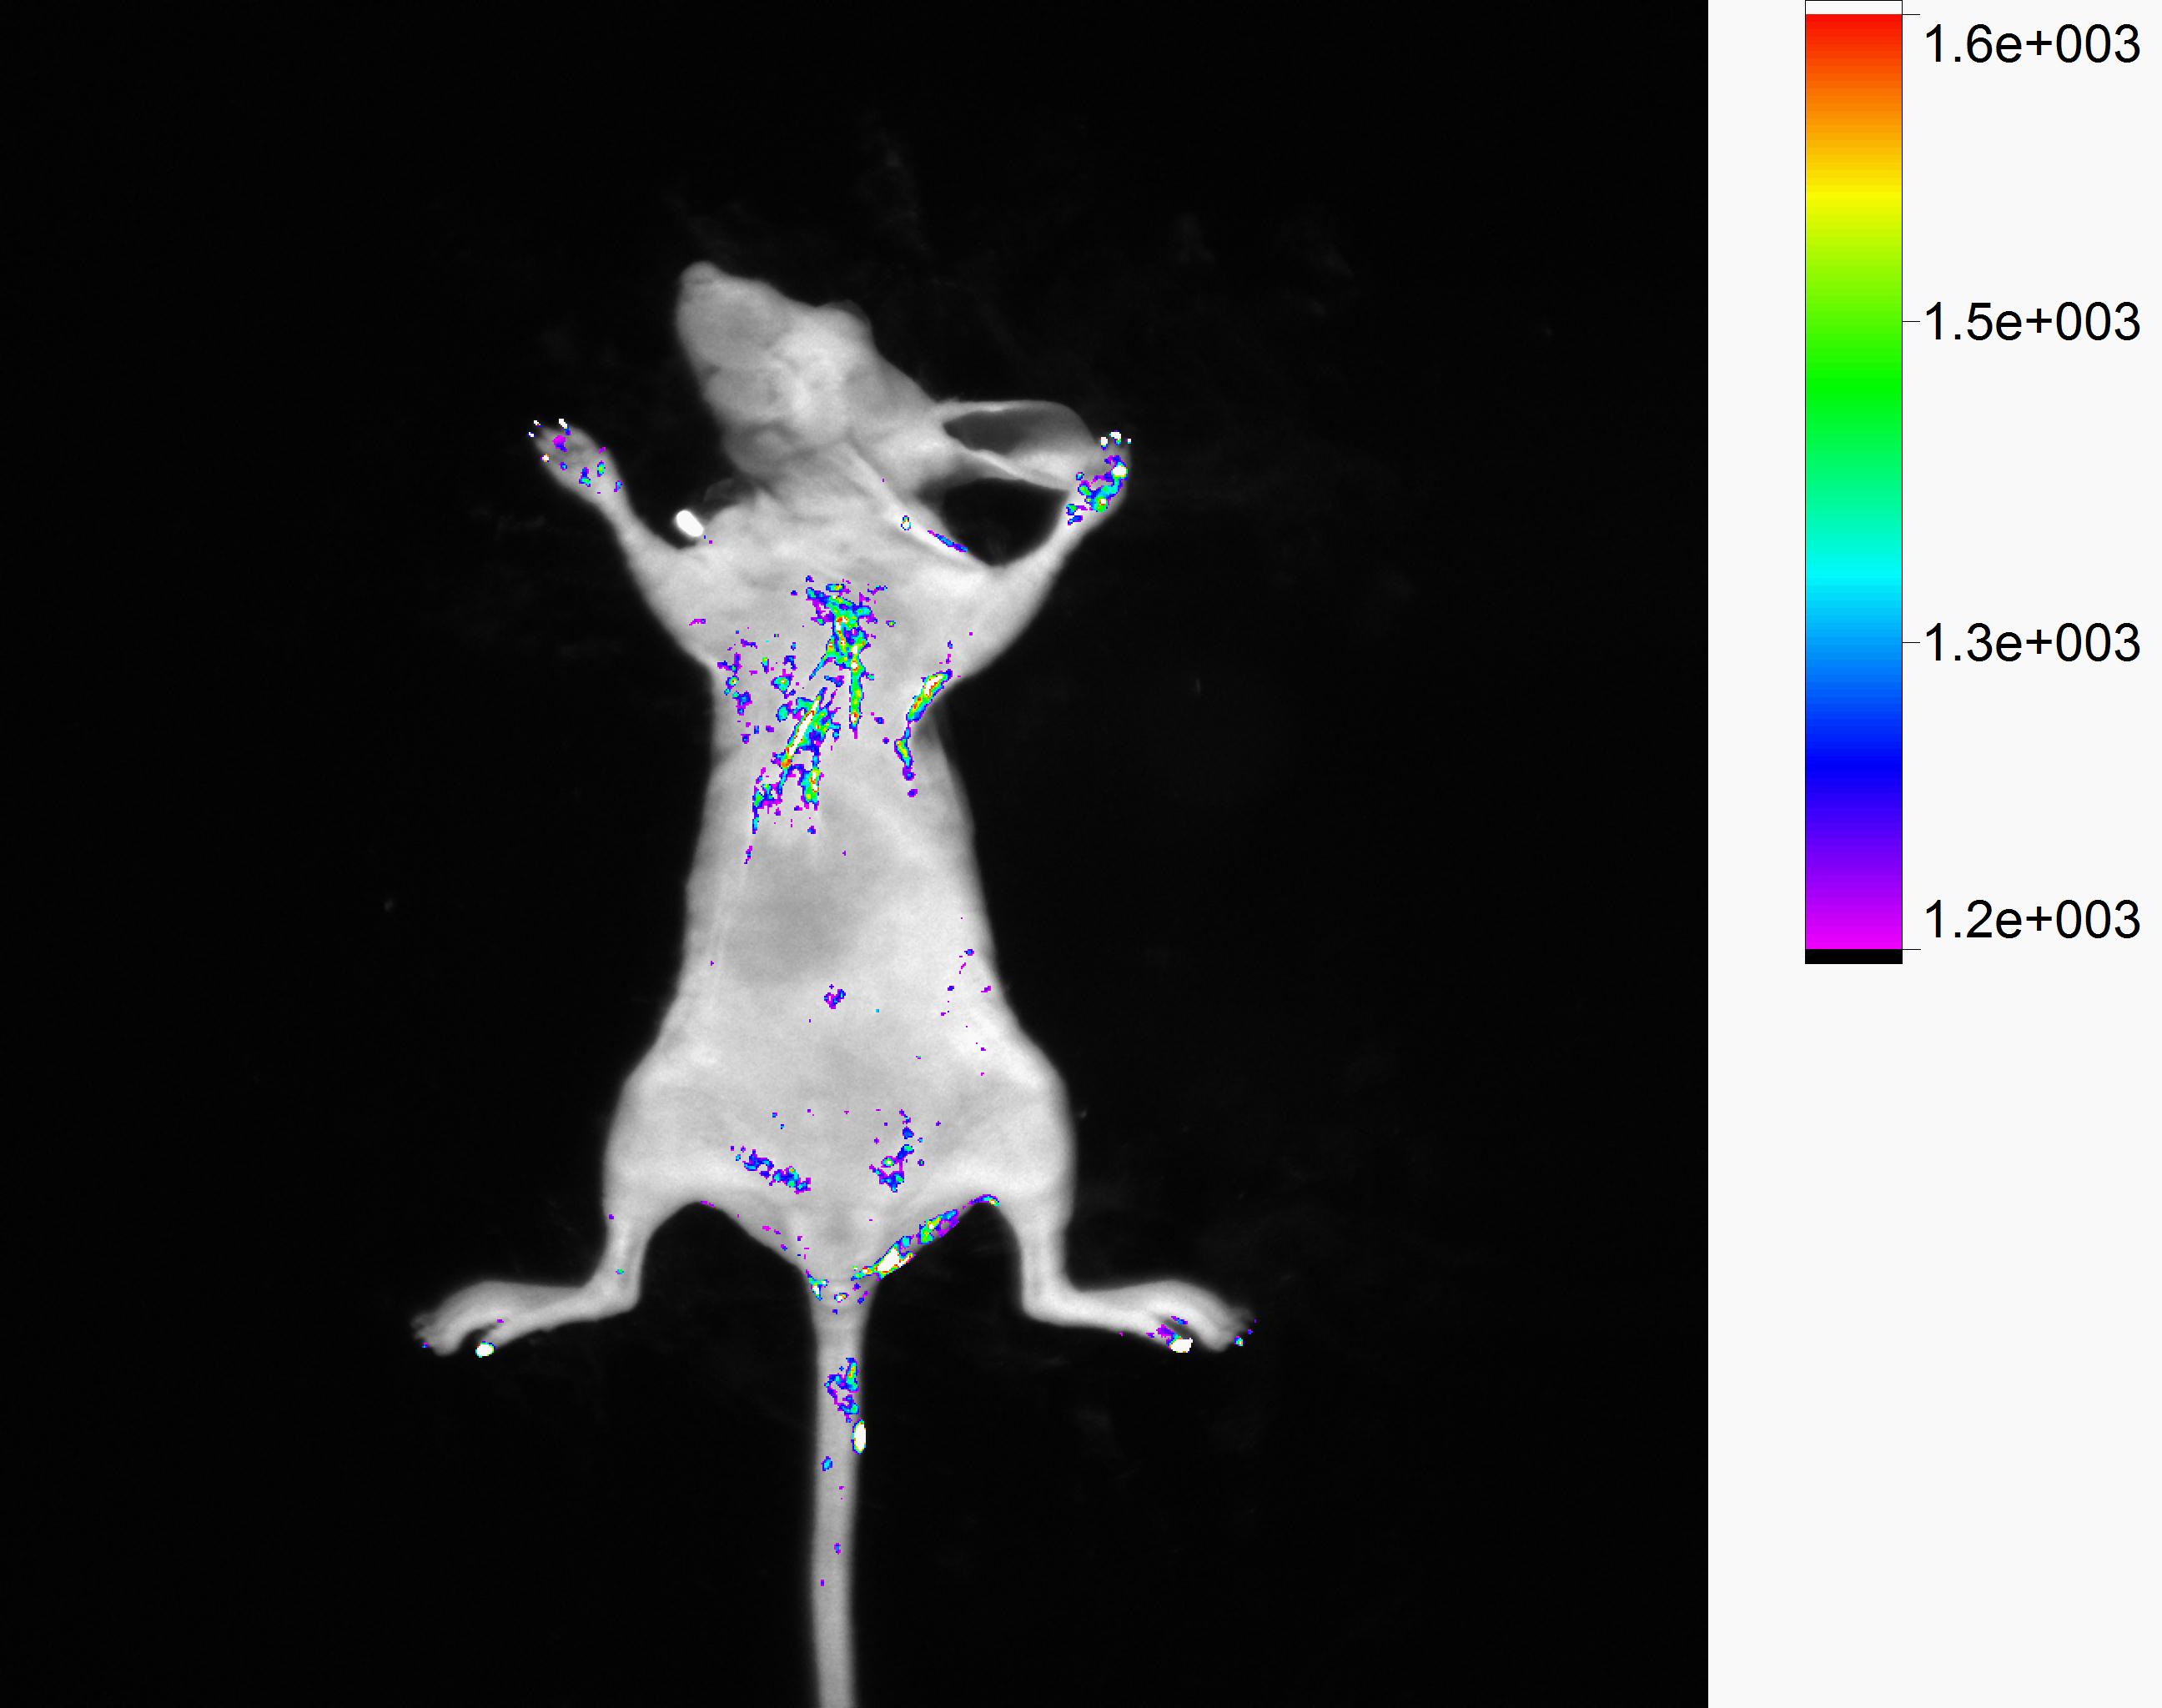

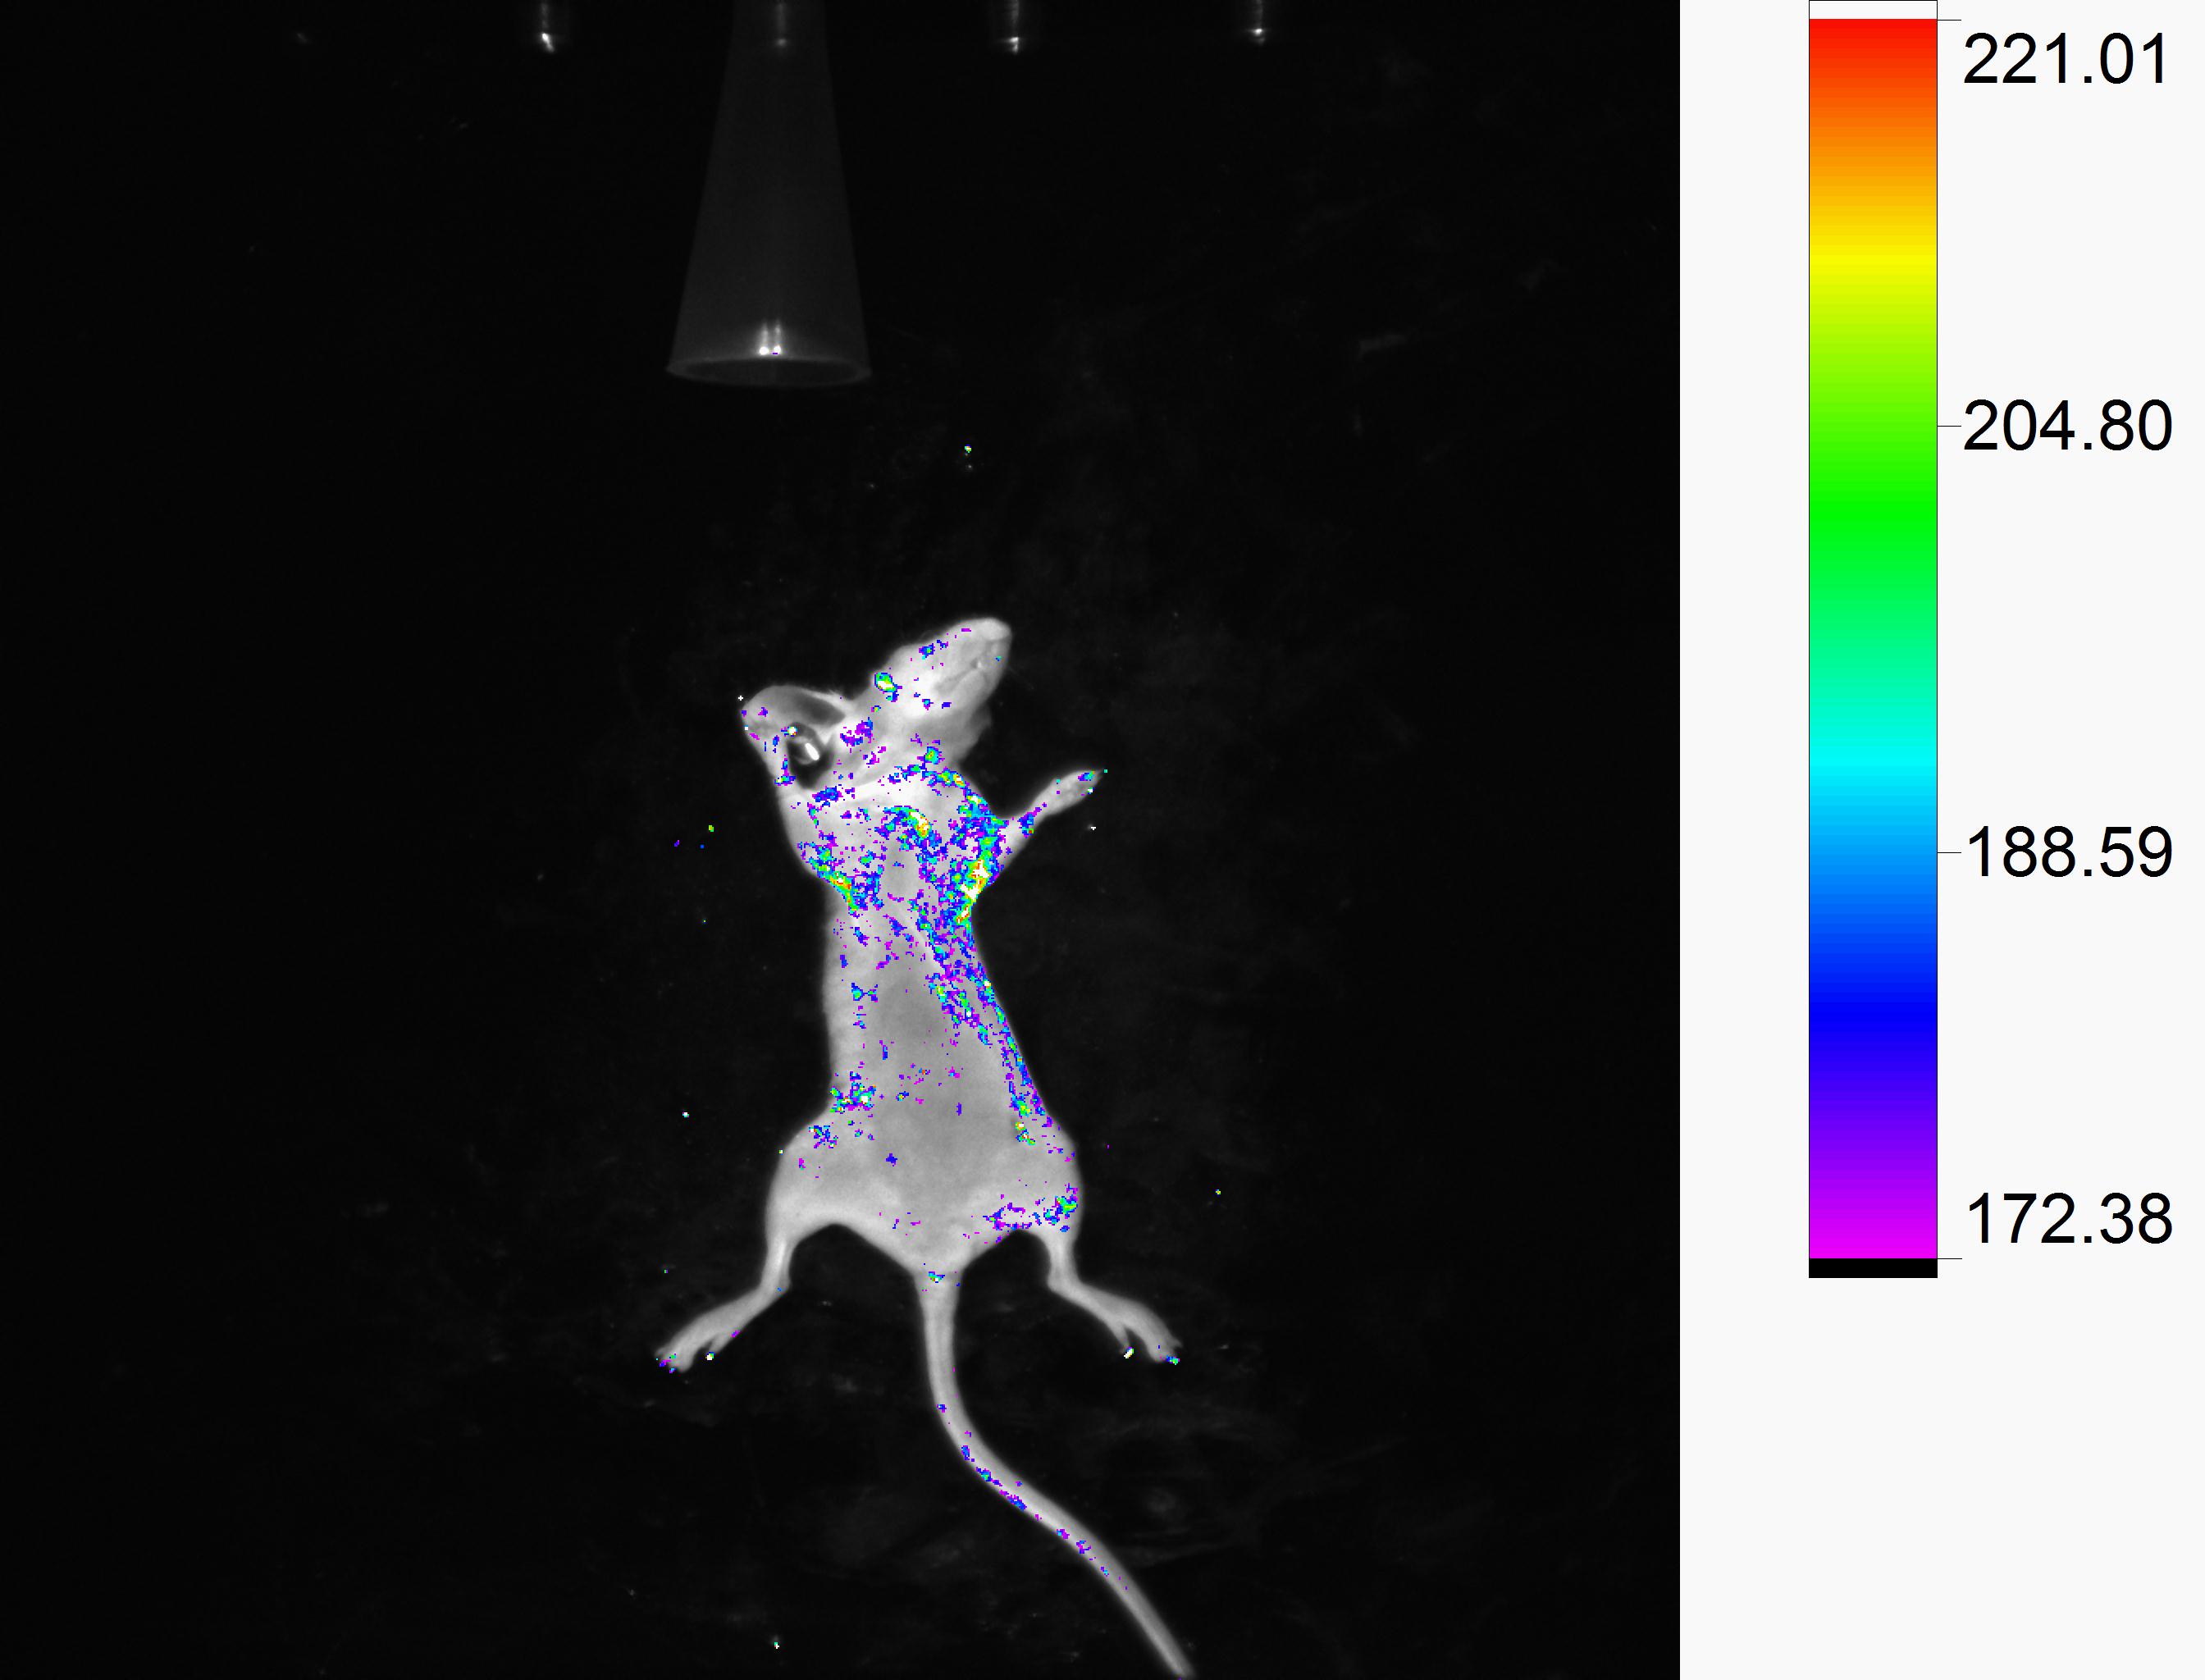


Control

OE-EPS8L1

**Fig.S4**. Over-expression of EPS8L1 induce the colonization and metastasis of SKOV-3 ovarian cancer cells in vivo.(a)GFP-labelled SKOV-3 cells with OE-EPS8L1 or normal expression were injected into nude mice via tail vein for 8 weeks to allow metastatic colonization (Multiple repetition was performed).


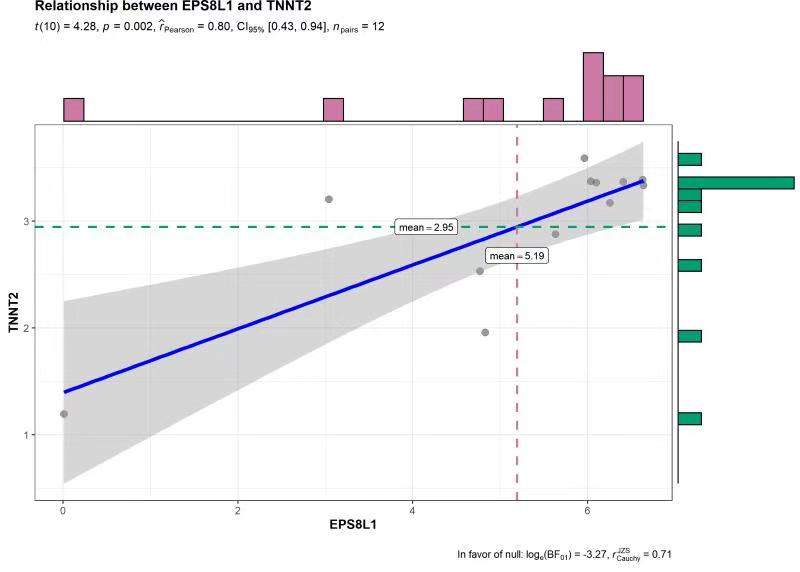

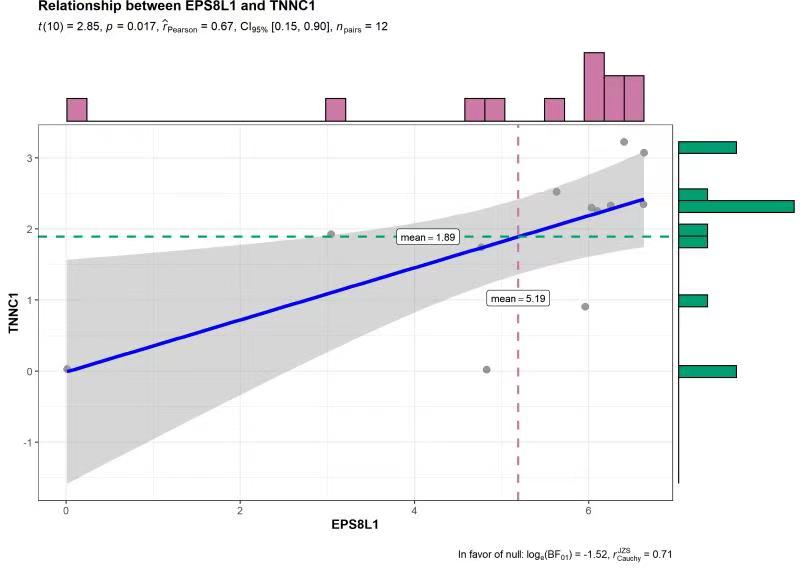

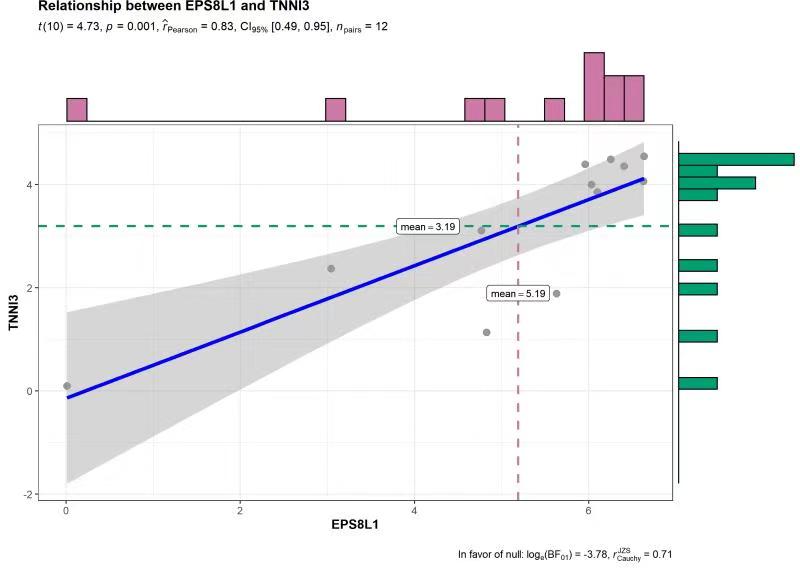


**Fig.S5.** **Bioinformatic analysis to identify genes associated with EPS8L1 by Pearson analysis on the dataset (GSE 36668) in the GEO database**. Expression data were obtained from serous ovarian carcinomas. Correlation coefficient r=0.4-0.6 was considered as moderate correlation, ***p<0.001.

**Fig.S6. Bioinformatic analysis to identify genes associated with EPS8L1.** Pearson analysis of EPS8L1-related genes using the online analysis website GEPIA (http://gepia.cancer-pku.cn/).


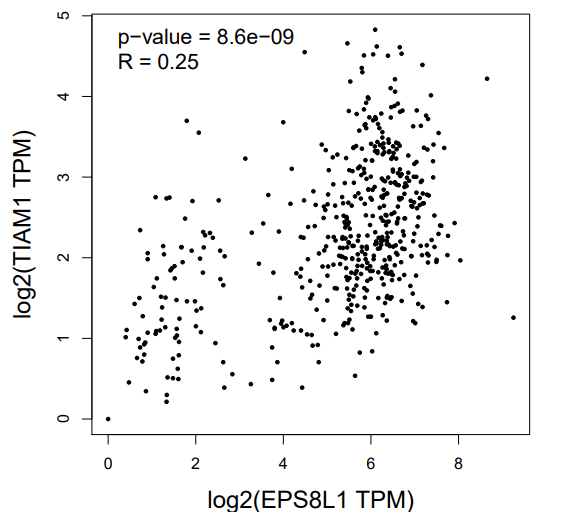

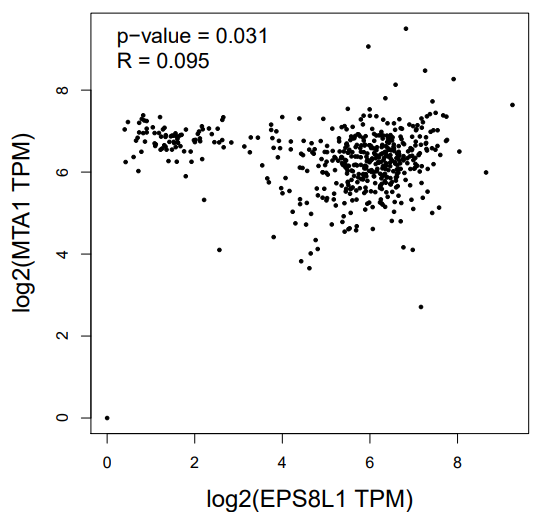

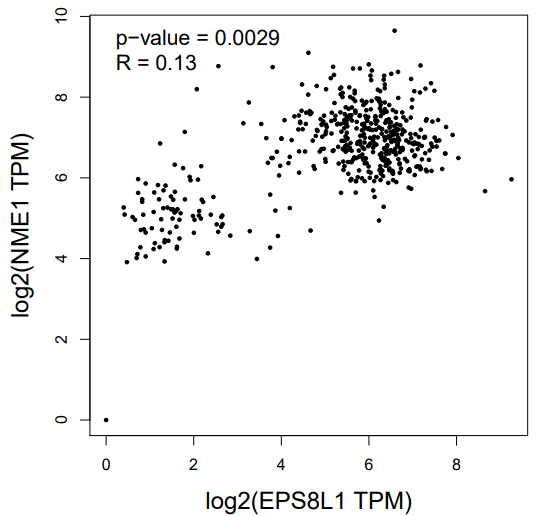

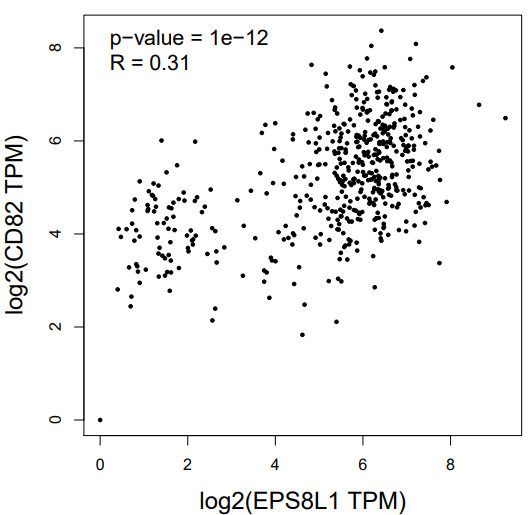

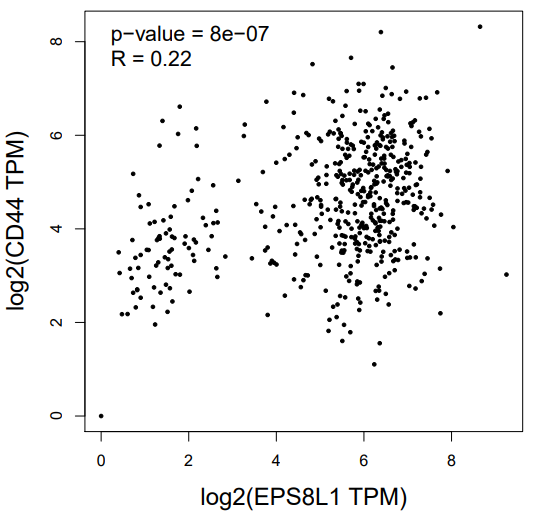

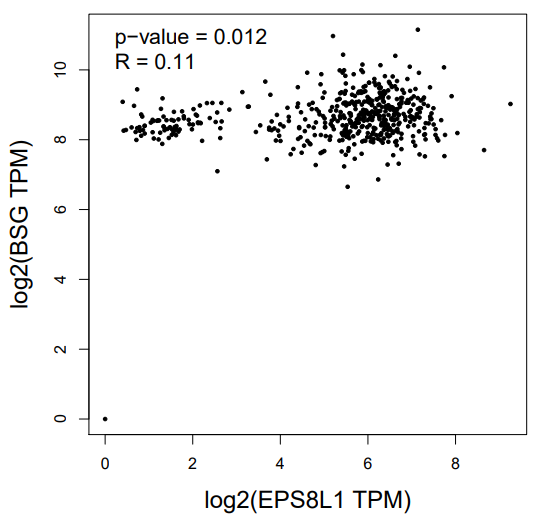


**
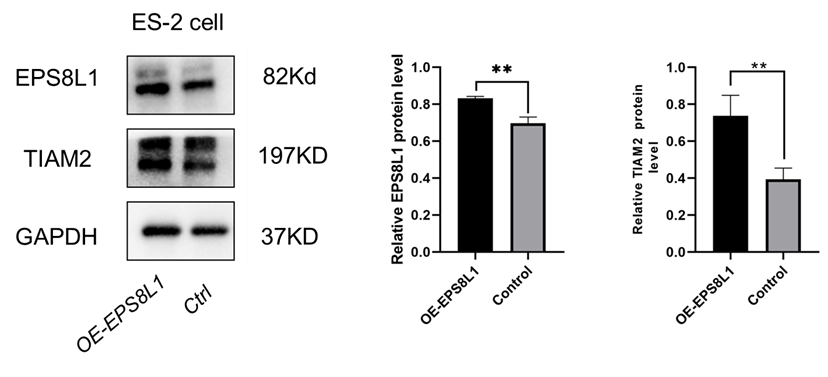
**

**Fig.S7.** **The** **detection of TIAM2 expression up-regulated after EPS8L1 over-expression in ES-2 cells.** Data were shown as means±SD (n=3), ImageJ software analyzed the gray value of protein expression.

| Mitomycin C concentration(μg/mL) | Cell Count/ml |
| --- | --- |
| Before administration | 2.880±0.033 |
| 0 | 3.600±0.018*** |
| 1 | 3.429±0.085*** |
| 2 | 3.143±0.078** |
| 4 | 2.650±0.077(NS) |
| 8 | 1.122±0.155*** |

**Fig.S8. Inhibitory effect of mitomycin C on cell proliferation.** Cells were planted on a 6-well plate at a rate of 1.5 * 10 6cells/ml,,set the concentration gradient of mitomycin C administration group(1，2，4，8μg/mL) and negative control group(0μg/mL). Before administration, digested and counted the cells of the negative control group.Then changed serum-free medium for 24 hours after 1 hour of mitomycin C to simulate the scratch test process. Finally, digested the cells in each group and counted them again. After comparing with the number of cells in the each group with Before administration group, arrived at the 4μg/mL mitomycin c concentration .
